## **A novel minimally invasive and reproducible large animal ischaemia-reperfusion-infarction model: methodology and model validation**

Charlene Pius, Barbara Niort, Emma J. Radcliffe, Andrew W. Trafford\*

Division of Cardiovascular Science, School of Medical Science, Faculty of Biology Medicine and Health, University of Manchester, Manchester Academic Health Science Centre, United Kingdom

\* Corresponding

[Andrew.W.Trafford@manchester.ac.uk](mailto:Andrew.W.Trafford@manchester.ac.uk)

3.24 Core Technology Facility

46 Grafton Street

Manchester

M13 9NT

United Kingdom

+44 161 275 7969

1                    **A novel minimally invasive and reproducible large animal**  
2                    **ischaemia-reperfusion-infarction model: methodology and model**  
3                    **validation**

4                    **Abstract**

5                    Ischaemic heart disease remains a leading cause of premature mortality and morbidity.  
6                    Understanding the associated pathophysiological mechanisms of cardiac dysfunction arising  
7                    from ischaemic heart disease and the identification of sites of novel therapeutic intervention  
8                    requires a preclinical model that reproduces the key clinical characteristics of myocardial  
9                    ischaemia, reperfusion and infarction. Here we describe and validate a refined and minimally  
10                    invasive translationally relevant approach to induce ischaemia, reperfusion and infarction in  
11                    the sheep. The protocol uses clinical cardiology devices and approaches and would be  
12                    readily adopted by researchers with access to standard fluoroscopic instrumentation. In  
13                    addition to being minimally invasive, the major refinements associated with the described  
14                    methodology are the implantation of an intracardiac defibrillator prior to coronary  
15                    engagement and use of an antiarrhythmic medication protocol during the procedure. These  
16                    refinements lead to a reduction of intraoperative mortality to 6.7 %. The model produces key  
17                    characteristics associated with the 4<sup>th</sup> Universal Definition of Myocardial Infarction including  
18                    electrocardiographic changes, elevated cardiac biomarkers and cardiac wall motility defects.  
19                    In conclusion, the model closely replicates the clinical paradigm of myocardial ischaemia,  
20                    reperfusion and infarction in a translationally relevant large-animal setting and the applied  
21                    refinements reduce the incidence of intraoperative mortality typically associated with  
22                    preclinical myocardial infarction models.  
23

## 24 **Introduction**

25 Cardiovascular diseases, mainly ischaemic heart diseases (IHD), are the leading cause of  
26 mortality in the United Kingdom<sup>1, 2</sup> and worldwide<sup>3</sup>. Coronary artery disease (CAD) is one of  
27 the most important causes of IHD<sup>4</sup> and is characterised by a reduction in the volume of  
28 perfusion to the heart (i.e., ischaemia) or even its complete cessation (i.e., infarction)<sup>5-7</sup>. Acute  
29 myocardial infarction (MI) is defined as myocardial necrosis in the context of myocardial  
30 ischaemia, which can be transmural, involving all three layers of the heart (endocardium, mid-  
31 myocardium, and epicardium) or non-transmural, typically sparing the epicardium<sup>5-11</sup>.  
32 Classically, non-transmural MI present clinically with non-ST segment elevation (NSTEMI) on  
33 the electrocardiogram (ECG) are treated primarily with anti-platelet treatment, peri-  
34 interventional anticoagulant treatment, and coronary angiography with a view to  
35 revascularization within 72h<sup>11</sup>. Transmural MI are associated with ST segment elevation  
36 (STEMI) on the ECG and are treated with primary percutaneous coronary intervention  
37 (PPCI)<sup>12</sup>. Complications following MI include ventricular arrhythmias (VA)<sup>13, 14</sup> and heart failure  
38 (HF)<sup>15</sup>, which can manifest early or late<sup>15-17</sup>. VA can occur in the form of ventricular tachycardia  
39 (VT)<sup>14, 18</sup> or ventricular fibrillation (VF). These life-threatening complications necessitate  
40 increased research to identify novel therapeutic targets that may ultimately alter prognosis  
41 following MI and ultimately this necessitates translationally relevant animal models.

42 When studying a disease, especially the precise molecular aspects of dysregulation, the  
43 animal model should ideally be as clinically relevant as possible. Occluding a coronary artery  
44 in an experimental animal can induce a reaction comparable to an acute MI caused by  
45 atherosclerosis or thromboembolic events. Most of the current small (mouse or rat)<sup>19</sup> and large  
46 (pig, sheep or dog) mammal models of cardiac dysfunction from ischaemia consist of the  
47 permanent ligation of the LAD<sup>20-24</sup> (for review see<sup>25, 26</sup>). Whilst they are reliable models for  
48 inducing tissue damage and HF, they do not accurately reflect the clinical setting occurring as  
49 a result of a reperfusion of the occluded vessel during PPCI. Other models use intracoronary  
50 injections of thrombogenic material causing a permanent occlusion and therefore, in the same  
51 way, do not reflect the typical clinical situation. Importantly, the reperfusion phase may also  
52 be associated with cardiac dysfunction known as ischaemia-reperfusion injury (IRI) including  
53 arrhythmias, myocardial stunning and vascular obstruction<sup>27</sup>. None of these potential sequelae  
54 occur in models of total and permanent occlusion.

55 The development of percutaneous transluminal coronary angioplasty balloon catheters to treat  
56 coronary atherosclerotic stenosis has led to the creation of less invasive ischaemia-  
57 reperfusion animal models. However, all these models still present with a low survival rate<sup>20,</sup>  
58 <sup>28, 29</sup>, predominantly owing to arrhythmic death or low cardiac output state<sup>28</sup>. This high mortality  
59 rate is at odds with key elements of the 3R's principles of animal research<sup>30-32</sup> (Reduction;  
60 Refinement and Replacement), making the establishment of a large mammal MI model more  
61 challenging.

62 The heart of large animals shares many electrophysiological and contractility similarities to  
63 humans, which is why modelling cardiac diseases in these species generally better reflects  
64 human pathologies and thus drug and interventional effects than in small animals<sup>33</sup>.  
65 Additionally, large animal models also allow for the implementation of minimally invasive  
66 approaches and use of clinical grade materials and devices thus conferring an inherent  
67 refinement aspect of 3R's considerations. Canine and porcine models using balloon occlusion

68 of coronary arteries already exist. However, both models present limitations. Studies suggest  
69 that the vascular architecture of the porcine and canine heart differs from that of a human  
70 heart, and hence may be less representative of the remodelling that occurs in a human with  
71 ischaemic heart disease. Specifically, when compared to human, pig and sheep, rodent and  
72 canine hearts are known to have a greater collateral network which can affect the ability to  
73 form a predictable infarct size<sup>34-36</sup>. Furthermore, pig models are associated with a high rate of  
74 sudden death caused by ventricular arrhythmias following MI (reviewed in<sup>37</sup>). Lastly, an  
75 additional logistical consideration is that husbandry can become very difficult as pigs grow  
76 rapidly to large size. The ovine heart is one of the closest to the human, and therefore is  
77 accepted as a good pre-clinical animal model for cardiovascular research<sup>38</sup>. A clear scientific  
78 protocol for the experimental induction of ischaemia/infarction-reperfusion injury and study of  
79 STEMI in sheep is lacking. It is essential to develop comprehensive, reproducible, reliable  
80 protocols and criteria for knowledge and skill transfer, as well as to ensure that investigations  
81 can be replicated with minimal animal suffering to ensure good proximity to the clinical  
82 scenarios the in vivo modelling is attempting to reproduce.

83 Here, we have developed a minimally invasive large mammal ischaemia/infarction-reperfusion  
84 model in sheep, which is more clinically relevant, with a considerably lower mortality rate  
85 (6.7%) than other previously reported large animal models. To that end, we refined a  
86 prophylactic intra-operative anti-arrhythmic drug protocol and added a surgical step involving  
87 the implantation an internal cardiac defibrillator to assist with rapid defibrillation of ventricular  
88 arrhythmias.  
89

## 90 **Results**

### 91 **Defining a model of infarction-reperfusion large mammal**

92 A total of 28 female Welsh Mountain sheep aged  $\sim 18 \pm 6$  months weighing  $38 \pm 1.2$  kg were  
93 used in this study. Following carotid cannulation, a 6F JR4 guide catheter was advanced down  
94 the 6F haemostatic sheath to reliably engage the left coronary ostium. After left coronary artery  
95 angiography, the balloon was successfully placed below the second diagonal branch of the  
96 LAD (supplementary figure 1). Only 2 of the 28/30 sheep died following MI induction from  
97 intractable ventricular fibrillation. Total mortality was 6.7 % all occurring intraoperatively before  
98 reperfusion.

99 Using a minimally invasive coronary angiographic technique, the infarct was created by  
100 inflating an intra-coronary balloon for 90 minutes to occlude blood flow followed by reperfusion.  
101 Both occlusion and reperfusion were confirmed by angiography. In order to validate the model,  
102 we set out to achieve the key criteria set out in the 4<sup>th</sup> universal definition where MI is defined  
103 as myocardial necrosis in the context of myocardial ischaemia resulting in an elevation of a  
104 cardiac biomarker such as cardiac troponin I (cTnI)<sup>39</sup> with at least one value above the 99<sup>th</sup>  
105 percentile upper reference limit. The diagnosis of MI requires additional criteria, including at  
106 least one of the following: (1) clinical symptoms of ischaemia including chest discomfort; (2)  
107 electrocardiographic (ECG) ischaemic features such as the development of new changes in  
108 the ST and T segment (ST-T) or new left bundle branch block (LBBB); (3) new pathological Q  
109 waves; (4) imaging evidence of reduced cardiac wall contractility; and/or (5) evidence of an  
110 intracoronary thrombus visualised via angiography or on autopsy<sup>40, 41</sup>. Specific objective  
111 assessment of chest discomfort is clearly impossible to achieve in animal models, however  
112 each of the remaining four criteria are assessable with readily applicable methods or  
113 investigations. We will, in turn, consider each of the assessable 4<sup>th</sup> Universal Definition criteria  
114 achieved using the minimally invasive model of STEMI presented here.

### 115 **Temporal changes in serum cTnI**

116 In this model, cTnI serum levels were easily and rapidly evaluated<sup>42</sup> using whole blood  
117 samples and a point-of-care device (see Methods; upper limit of detection 50 ng/ml).  
118 Measurements were made at various stages during the procedure (Fig 1). At baseline, all  
119 animals had near-zero values. Following the inflation of the angioplasty balloon, we observed  
120 an elevation in a cTnI ( $p < 0.0001$ ), displaying the typical rise and fall pattern seen in STEMI  
121 patients<sup>43-46</sup>. The cTnI levels rose significantly during reperfusion ( $1.2 \pm 1$  ng/ml;  $p < 0.01$ ) and  
122 continued to rise at 30 minutes post-reperfusion ( $27.4 \pm 3$  ng/ml;  $p < 0.0001$ ) with a peak  
123 observed at a measurement time of 90 minutes post-reperfusion ( $46 \pm 1.8$  ng/ml;  $p < 0.0001$ )  
124 when compared to baseline ( $0.03 \pm 0$  ng/ml). The levels started to decline by day 2 to 4 ( $21.5$   
125  $\pm 3$  ng/ml;  $p < 0.0001$  vs baseline) with a further decline after 1 week ( $0.6 \pm 0.2$  ng/ml;  $p < 0.01$   
126 vs baseline) and returning to baseline values by week 3 ( $0.03 \pm 0.0$  ng/ml) and remaining low  
127 until the end of the study (week 8;  $0.01 \pm 0.0$  ng/ml) (Fig. 1).

128

129 **Fig. 1 - cTnl measurements.** cTnl  
130 measurements at baseline, intraoperatively and  
131 on day 2 - 4, 1 - 1.5 weeks, 3 weeks and 8  
132 weeks demonstrating the expected rise and fall  
133 pattern seen in MI. *N*, baseline= 28; pre-  
134 occlusion = 28; immediate reperfusion = 27; at  
135 30 mins post-reperfusion = 28; 90 mins post-  
136 reperfusion = 28; Days 2 - 4= 28; Weeks 1 -  
137 1.5= 20; Week 3 = 9; Week 8 = 10. \*\*\*\* *p* <  
138 0.0001 \*\* *p* < 0.01 vs baseline; ##### *p* < 0.0001  
139 vs 90 minutes post-reperfusion by Kruskal-Wallis  
140 test.

141

142

143

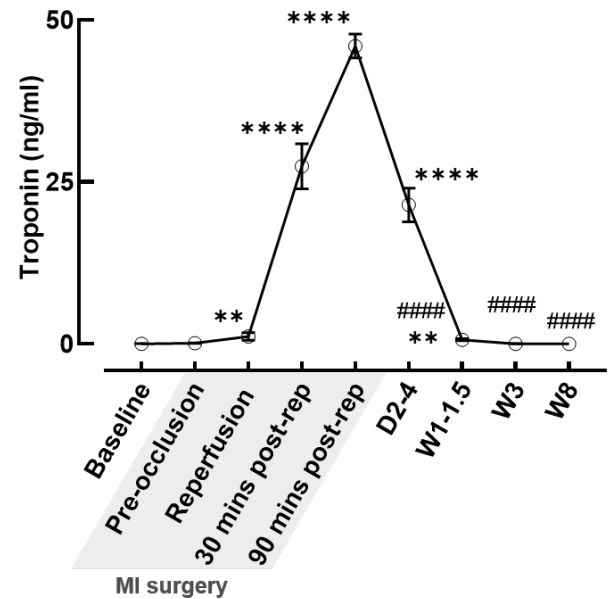

#### 144 **Electrocardiographic changes following myocardial ischaemia-reperfusion injury**

145 The intention with this model was to create an ST segment elevation MI thus most closely  
146 resembling the clinical cohort of patients being treated with PPCI. The ST segments started  
147 to rise upon coronary occlusion ( $0.07 \pm 0.02$  mV) with a statistically significant increase seen  
148 on reperfusion ( $0.13 \pm 0.03$  mV;  $p < 0.0001$ ) compared to baseline ( $0.02 \pm 0.00$  mV). ST  
149 segment normalisation was already evident at the end of surgery ( $0.05 \pm 0.01$  mV;  $p < 0.05$   
150 vs reperfusion) (Fig. 2a and b). The dynamic pattern of these ST segments supports the  
151 diagnosis of MI<sup>41, 47</sup>. Intraoperative ventricular arrhythmias requiring intracardiac defibrillation  
152 were observed in 8 of 27 animals.

153 The T wave amplitude peaked on reperfusion ( $0.19 \pm 0.03$  mV;  $p < 0.05$ ) compared to baseline  
154 ( $0.13 \pm 0.03$  mV) with a gradual return to near normal values by the end of surgery ( $0.12 \pm$   
155  $0.02$  mV;  $p < 0.01$  vs reperfusion) (Fig. 2c and d). T peak amplitude increment could be a  
156 consequence of interstitial hyperkalaemia from myocardial ischaemia<sup>42,43</sup>.

157 We also took the opportunity to calculate the T-peak Tend interval, which is suggested as a  
158 measure of transmural dispersion of repolarization<sup>40,41</sup>. Upon coronary occlusion, the Tpeak-  
159 Tend interval more than doubled ( $83 \pm 11$  ms vs  $37 \pm 2.3$ ms ;  $p < 0.001$ ) with maximal  
160 prolongation seen on reperfusion ( $110 \pm 16$ ms;  $p < 0.0001$ ) declining by the end of surgery  
161 ( $96 \pm 16$  ms;  $p < 0.001$ ) whilst remaining prolonged compared to baseline (Fig. 2d and e).

162

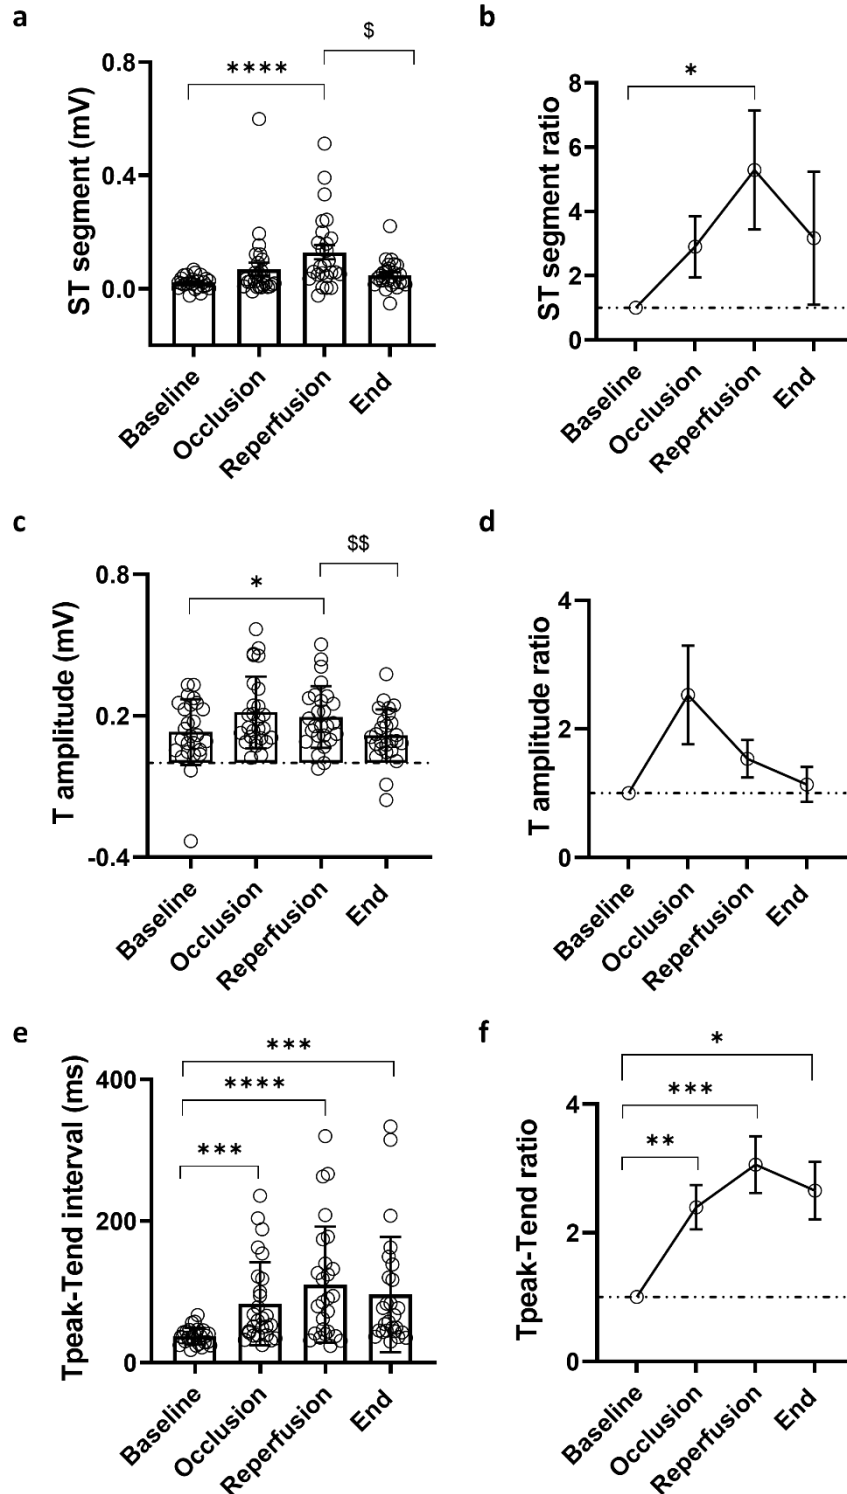

163

164

**Fig. 2 Electrocardiographic changes following ischaemia-reperfusion injury.** ST

165 segment changes as **a**, absolute measurements and **b**, difference in height compared to

166 baseline. T wave amplitude changes as **c**, absolute measurements and **d**, ratio compared to

167 baseline measurements. Tpeak-Tend interval changes as **e**, absolute values and **f**, ratio

168 values compared to baseline. *N*, baseline = 25 - 27, occlusion = 25 - 27, reperfusion = 25 -

169 26, end = 25 - 26. \*\*\*\* *p* < 0.0001, \*\*\* *p* < 0.001, \*\* *p* < 0.01, \* *p* < 0.05 vs baseline, \$\$ *p* <

170 0.01, \$ *p* < 0.05 vs reperfusion by mixed effects model analysis and RM one-way ANOVA.

171

## 172 Change in cardiac contractile function and planimetry

173 Left ventricular ejection fraction (EF) was estimated at intervals as described in the methods  
174 section. Pre-surgery EF was  $73 \pm 1.4\%$  and declined following MI being  $58 \pm 2.1\%$  at 1 – 1.5  
175 weeks ( $p < 0.0001$ ),  $60 \pm 3.1\%$  ( $p < 0.05$ ) and  $52 \pm 1.7\%$  at 8 weeks post MI ( $p < 0.0001$ )  
176 demonstrating a 21% decline in EF compared to baseline ( $p < 0.0001$ ) (Fig. 3a). While the  
177 final EF value at 8 weeks was higher than those mentioned in other studies<sup>44</sup>, the total  
178 reduction in EF of 21% was bigger than the 14% described in a previous study<sup>45</sup>. We also  
179 measured fractional shortening (FS), as a measure of contractility and this parameter also  
180 declined from pre-surgery levels of  $39 \pm 1.1\%$  to  $30 \pm 1.4\%$  at 1 – 1.5 weeks and  $27 \pm 1.1\%$   
181 at 8 weeks respectively following MI. (Fig. 3b,  $p < 0.0001$ ).

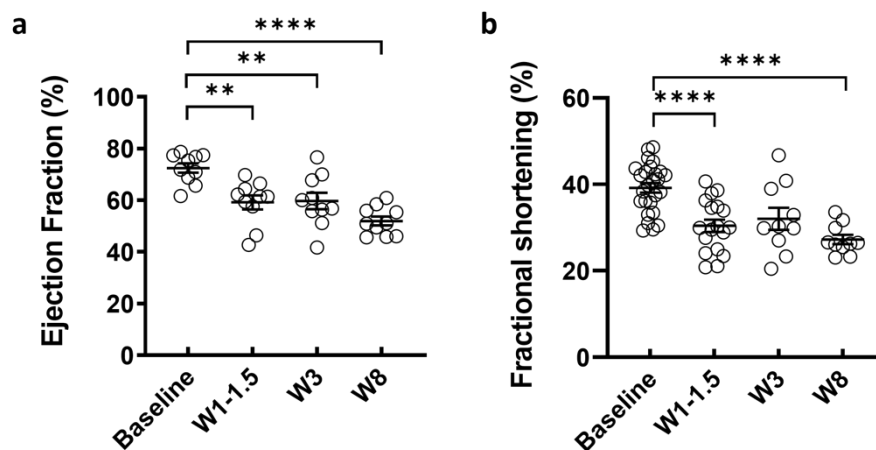

182  
183 **Fig. 3 – Echocardiographic evaluation of LV systolic function.** Measurements of **a**, EF  
184 and **b**, FS from baseline to week 8. N, Baseline= 25, W1 - 1.5 = 17, W3= 10, W8 = 10. \*\*\*\* p  
185 < 0.0001, \*\* p < 0.01, compared to baseline, by mixed effects model analysis.

186  
187  
188 After an MI it is known that LV remodelling involves changes in wall thickness in both infarcted  
189 and non-infarcted regions<sup>48-50</sup>. We first evaluated the wall thickness of the infarcted region in  
190 comparison to the non-infarcted LV wall. Here, we present the results as the fraction of the  
191 change in wall thickness at the infarcted site when compared to the non-infarcted site on the  
192 same acquisition plane in systole and diastole. This was done to reduce the effect of variations  
193 in the acquisition plane, particularly at the distal LV level where landmarks were less clear.

194 At mid-LV level, there were no statistically significant changes in the wall thickness in diastole  
195 (Fig 4a) or systole (Fig 4b) following MI, which was likely due to the more apical infarct location.  
196 Conversely, at the distal-LV level, where the infarct would be more pronounced, an increase  
197 in wall thickness was noted at week 1-1.5 and week 3 in both diastole and systole compared  
198 to baseline (Fig 4c). In systole, there was an increase in wall thickness which was maintained  
199 from 1 – 1.5 to 8 weeks post MI (Fig 4d). These changes are likely due to the occurrence of  
200 eccentric hypertrophy in the non-infarcted wall, thinning of the infarcted wall segments or a  
201 combination of both. These differences were more pronounced in systole as the infarcted  
202 segment is akinetic and unable to thicken adequately compared to the hyper-contractile non-  
203 infarcted segment<sup>51</sup>. These wall thickness changes further support the finding of regional wall  
204 motion abnormality, which further fulfils criteria set out in the Universal Definition of MI.



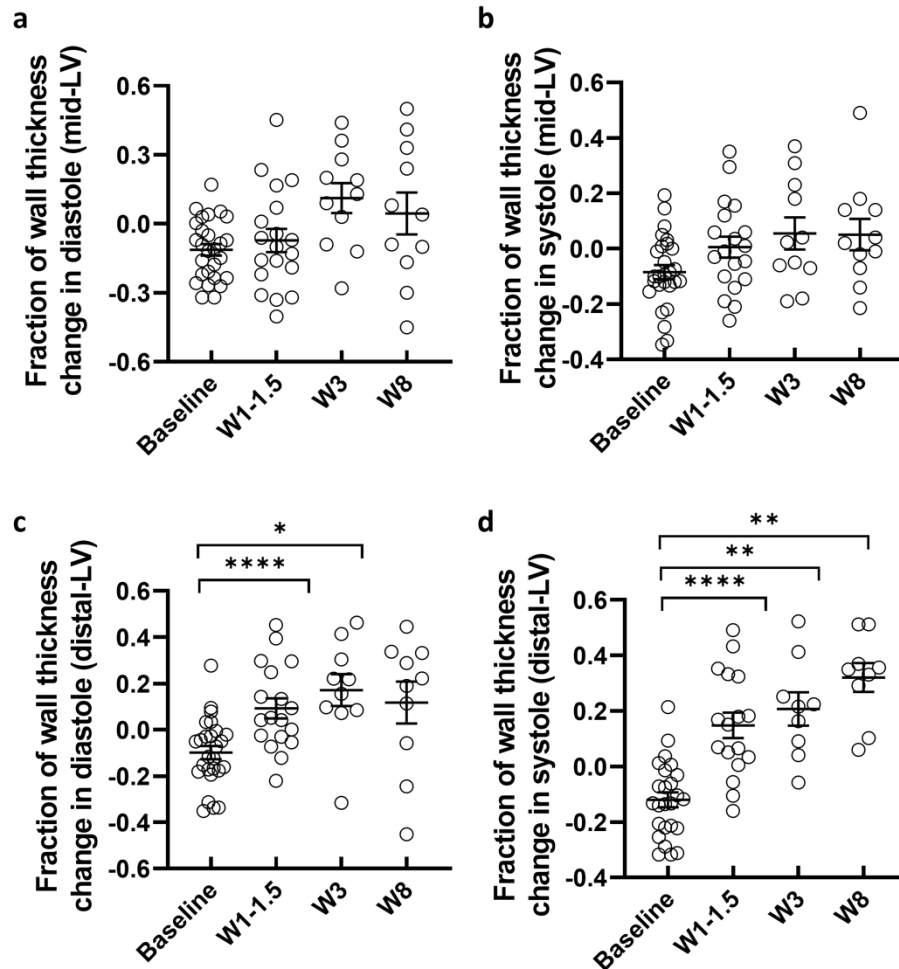

205  
206  
207  
208  
209

**Fig. 4 – Fraction of wall thickness change.** Wall thickness changes at mid-level in (a), diastole, and (b), systole. *N*, baseline=27, W1-1.5=19, W3=11, W8=11. Wall thickness changes at distal-LV level in diastole (c) and systole (d) *N*, baseline=25, D3=8, W1-1.5=17, W3=9, W8=9. \*\*\*\**p* < 0.0001, \*\**p* < 0.01, \**p* < 0.05 by mixed effects model analysis.

210  
211

### 212 Gross morphology and infarct size.

213 The transient occlusion of the LAD after the second diagonal branch resulted in a well-defined  
214 area of infarction detectable at all three-time intervals despite varying appearance reflecting  
215 the acute, proliferative and maturation stages of scar formation (Fig. 5a, b and c). At 8 weeks,  
216 infarcts were more easily measured due to the presence of visible white area of scar tissue.  
217 The infarcts were less well visually defined after 3 days and 1.5 weeks. The infarct was best  
218 seen in a cross-sectional image, revealing the intra and transmural nature of scar tissue  
219 distribution. Planimetry was used to assess the size of the infarct from the anterior surface of  
220 the LV. The average size of an infarct was  $4.7 \pm 1 \text{ cm}^2$ . However, the infarct frequently  
221 extended around the apex into the posterior wall, making it difficult to accurately determine  
222 the infarct size using this measuring approach..

223 The variability in infarct size is consistent with the variable infarct size seen in humans. No  
224 correlation between infarct size and troponin levels (Fig. 5e) were observed but this is likely  
225 related to the limitations on both infarct size measurement and the upper limits of detection of  
226 the point of care cTnI assay (50ng/ml).

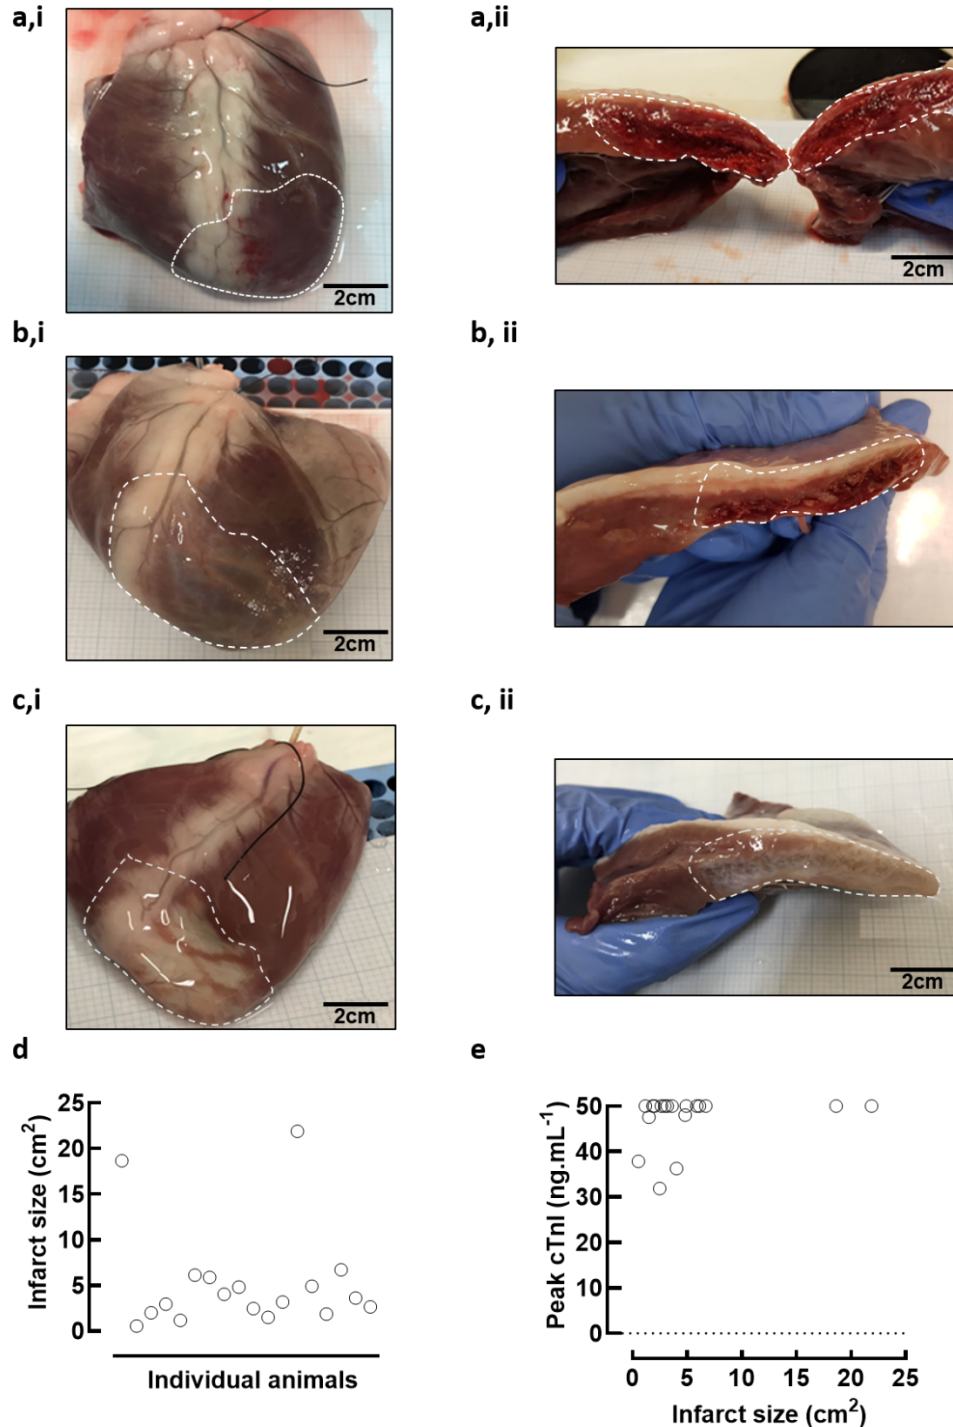

227

228

229

230

231

232

233

234

235

**Fig. 5 – Infarcts at 3 days, 1.5 weeks and 8 weeks.** Images of infarcts at **a**, 3 days, **b**, 1.5 weeks and **c**, 8 weeks as **i**, whole ventricle images and **ii**, LV cross-sectional images demonstrating different appearances in the infarct over time. The scale bar is shown in black. **d**, Infarct sizes from all animals at 3 days, 1.5 weeks and 8 weeks. **e**, The peak troponin value plotted against the infarct size with no relationship seen ( $N=26$ ). Relationship are determined by simple linear regression.

## 236 **Discussion**

237 We aimed to create a refined minimally invasive ischaemia/infarction-reperfusion model of  
238 myocardial infarction with improved survival outcomes. It was critical that our model survived  
239 to the specified time points of 3 days, 1.5 weeks, and 8 weeks in order to assess the temporal  
240 evolution of the acute, latent, and chronic phases following a myocardial infarction. In order to  
241 achieve this, the experimental protocol was refined with specific measures to reduce the  
242 mortality rate previously described in the literature<sup>28</sup> including the inclusion of prophylactic anti-  
243 arrhythmic medications<sup>47, 52, 53</sup> and the implantation of an internal cardiac defibrillator. Using  
244 this surgical and medication protocol, we successfully created reproducible infarcts and  
245 reduced procedural mortality. Importantly, the model fulfils the key criteria of the 4<sup>th</sup> universal  
246 definition of MI demonstrating i) the rise and fall of a cardiac biomarker (cTni), ii)  
247 electrocardiographic changes in the ST-T segment, iii) echocardiographic evidence of wall  
248 motion abnormality and iv) evidence of scar/infarct on the heart.

249  
250 During the occlusion period, we observed cardiac repolarization abnormalities in the form of  
251 ST-T segment changes. The presence of ST elevation indicates a transmural infarction, which  
252 affects the heterogeneity of the ionic properties of cardiac cells from the epicardial, myocardial,  
253 and endocardial layers<sup>54, 55</sup>. It is debateable as whether the repolarisation abnormalities are  
254 more reflective of transmural injury or the baso-apical position of the injury<sup>56</sup>.

255  
256 We also observed changes in contractile function and wall thickness over the temporal  
257 evolution of the MI. It is known that, during the post infarct remodelling phase, the infarcted  
258 segment undergoes thinning and expansion. The apico-anterior segments are particularly  
259 vulnerable to this as they are the thinnest segments with the greatest curvature<sup>57-60</sup>. This is  
260 accompanied by hypertrophy of the non-infarcted region<sup>57-62</sup>, which may serve as a temporary  
261 compensatory mechanism. The hypertrophy occurs in response to increased wall stress as a  
262 consequence of the infarcted segment<sup>61</sup>. This is often not enough to restore the original  
263 function, as we have demonstrated here. In fact, this eccentric hypertrophy often contributes  
264 to worsening dilatation during remodelling<sup>60</sup>, which may explain the deterioration in LV  
265 function observed at 8 weeks.

266  
267 There was large inter-animal variability in infarct size with a coefficient of variation of 104%.  
268 This is likely due to the inter-animal LAD anatomical variations in the D2 bifurcation point and  
269 the limitations of the infarct measurement method. In an effort to standardize the approach,  
270 we aimed to occlude the LAD after the D2 bifurcation. However, the variability in coronary  
271 anatomy, particularly of the LAD vessel which has been previously described in sheep is likely  
272 to have contributed to this<sup>45</sup>. We aimed to achieve an anterior-apical infarct involving ~ 25%  
273 of the LV. In some animals, the point of D2 bifurcation was quite proximal and would affect  
274 more than the intended area of myocardium. Whereas in other animals, the D2 branch  
275 followed a similar course to the LAD towards the apex potentially co-supplying the intended  
276 infarct territory.

277  
278 Finally, we demonstrated a lower rate of attrition and improved mortality rate compared to  
279 existing work<sup>20, 28, 29</sup> with the refinements in our experimental protocol. The models have  
280 survived the planned experimental time periods successfully allowing the temporal evolution  
281 of MI to be studied at an *in vivo* level and will allow future cellular and tissue studies.

282 Finally, we demonstrated that this model is clinically relevant due to similarities with existing  
283 STEMI patients undergoing PPCI reperfusion treatment. As a result, this model will allow for

284 a better understanding of the pathological evolution following MI and will help in the research  
285 of new therapeutic targets that may improve patient outcomes post MI. Furthermore, with  
286 further refinement, this model may be able to reflect a translatable HF model of ischemic  
287 cardiomyopathy following STEMI and could be used to select cardioprotective medications to  
288 protect STEMI patients from reperfusion damage.

289

290 The refinement aspects developed in this study encompassed the inclusion of a prophylactic  
291 intra-operative antiarrhythmic strategy including the use of amiodarone, lidocaine and atenolol  
292 and the use of an implantable cardiac defibrillator. Whilst approximately one-third of animals  
293 developed ventricular arrhythmias requiring defibrillation, our overall intra-operative mortality  
294 was reduced to 6.7%. This compares favourably to previous studies<sup>20, 26, 29, 37</sup> and provides a  
295 methodological approach that is easily applied to other large animal ischaemia reperfusion  
296 studies.

297

298

## 299 **Methods**

300 **Ethical statement.** All procedures involving the use of animals were performed in accordance  
301 with the United Kingdom (UK) Animals (Scientific Procedures) Act, 1986 and European Union  
302 Directive 2010/63. Local ethical approval was obtained from the University of Manchester  
303 Animal Welfare and Ethical Review Board. Reporting of animal experiments was in  
304 accordance with the ARRIVE guidelines 2.0<sup>31</sup>.

305  
306 **Animal.** Experiments were performed on naïve adult (~18 months) female Welsh Mountain  
307 sheep. Animals were not randomised as this study focused on model development and did  
308 not contain a sham-operated arm as all statistical comparisons were paired to pre-surgical  
309 values in the same animals. Animals were group housed, fed hay and water *ad libitum*, and  
310 maintained on a 12-hour light/12-hour dark cycle for at least 1 week prior to surgical  
311 intervention.

312  
313 **Myocardial infarction surgery.** In line with all experiments necessitating the use of general  
314 anaesthetic, animals were fasted overnight to prevent the risks of gastric distension but had  
315 unrestricted access to water. The full step by step protocol is available in Extended Methods  
316 Online Supplement. Induction of anaesthesia was achieved using a combination of isoflurane,  
317 (5% vol/vol) Santa Cruz Biotechnology, USA), Nitric Oxide (50%vol/vol) and O<sub>2</sub> (50% vol/vol  
318 at a flow rate of 5 L/min) administered via facemask. The depth of anaesthesia was confirmed  
319 by loss of the corneal blink reflex<sup>63</sup>. To facilitate the passage of the endotracheal tube into the  
320 trachea, lignocaine local anaesthesia spray (Xylocaine, Astra Zeneca, UK) was applied  
321 topically, reducing vocal cords and pharynx spasms and tracheal intubation with a cuffed  
322 endotracheal tube (8-10 mm). The cuffed endotracheal tube was then inflated to ensure a  
323 sealed circuit, avoid anaesthetic leakage, and prevent secretions and gastric contents from  
324 entering the lungs. The tube was then connected to a mechanical tidal ventilator (Zoovent,  
325 UK) and ventilation performed at a rate of 15 breaths/min. The maintenance of anaesthesia  
326 was achieved using an isoflurane concentration ~3% mixed with O<sub>2</sub> (4L/min). The following  
327 parameters were constantly monitored during the surgery: i) the depth of anaesthesia was  
328 monitored by assessing the corneal blink reflex, ii) arterial blood pressure an electronic  
329 sphygmomanometer (Cardell Veterinary Monitor 9402, Sharn, USA) placed on the shaved tail  
330 base, iii) arterial O<sub>2</sub> saturation (kept above 95%) using a doppler pulse oximeter (Nonin  
331 Medical, Inc., USA) placed on the tongue or on the shaved ear and, iv) the electrocardiogram  
332 was monitored using a five-lead continuous ECG (EMKA Technologies) digitised to a  
333 computer at a sampling rate of 1kHz (iOX2, EMKA Technologies).

334  
335 In order to correct for any blood loss during the surgery, an intravenous (IV) maintenance fluid  
336 (0.9% NaCl, Baxter, USA) was administered via an 18 to 22-gauge cannula (BD  
337 Microlance™, UK) positioned in the lateral saphenous vein from the right posterior limb at a  
338 constant flow rate over the course of surgery. This venous line was also used as a route for  
339 the administration of intravenous drugs (Fig. 6) via a coupled three-way tap.

340 Meloxicam (0.5 mg.kg<sup>-1</sup> subcutaneously; Metacam®, Boehringer Ingelheim, Germany) and  
341 amoxicillin (20µg.kg<sup>-1</sup> Betamox®, intramuscularly Norbrook, UK; or amoxicillin sodium,  
342 intramuscularly, Bowmed Ibisqus Ltd, UK) were used to provide analgesia and antibiotics. The  
343 surgery was carried out in two stages under aseptic conditions.

## 344 **Implantation of the internal cardiac defibrillator (ICD)**

345 The first stage consists of the implantation of an internal cardioverter defibrillator (ICD) device  
346 in order to allow prompt cardioversion of any sustained intra-operative ventricular arrhythmias  
347 and record the electrical cardiac function in the post-operative period. In detail, the animal was  
348 positioned in left lateral recumbency. A sterile field was prepared by shaving the wool over the  
349 right cervical region and cleansing with iodine (iodinated povidone 7.5 % Videne, UK). An ~ 8  
350 cm skin incision was made in the jugular groove and blunt dissection was used out to expose  
351 the jugular vein. Once adequately freed of attached fascia, 2.0 silk sutures (Ethicon, USA)  
352 were loosely placed proximally and distally. Further blunt dissection was then carried out to  
353 identify the carotid artery, which runs deeper alongside the vagus nerve. The carotid artery  
354 was then freed from the vagus nerve using blunt dissection and 2.0 silk anchoring sutures  
355 were placed loosely at the proximal and distal points of the artery (Fig. 6 a and b).

356 After tying off the proximal part of the jugular vein, a small incision was made into the vein and  
357 maintained open using a vein pick to allow the insertion of an ICD lead (Medtronic USA) The  
358 single chamber defibrillator lead comprises, from proximal to distal, an electrode to be  
359 anchored within the myocardium, and bifurcated (in a single coil lead) or trifurcated (in dual-  
360 coil lead) header connector pins. The connectors consist of one pace-sense IS-1 (or IS-4)  
361 connector, and one or two DF-1 (or DF-4) high voltage connectors<sup>64</sup>. Consequently, the active  
362 fix right ventricular (RV) lead was carefully advanced to the apex of the RV under fluoroscopic  
363 guidance (BV Pulsera, Philips, Netherlands).

364 The correct lead tip position was assessed prior to fixation in the RV by connecting the lead  
365 to an electrophysiological analyzer (Medtronic 209o Analyser; Medtronic Inc) and assessing  
366 three intraoperative electrocardiographic parameters: (i) the pacing threshold (i.e., the lowest  
367 pulse amplitude at which the heart can still be paced); (2) intracardiac potential (R-wave  
368 amplitude), and (3) lead impedance (300 - 1500 $\Omega$ )<sup>65, 66</sup>. Satisfactory elad positioning was  
369 confirmed by a combination of i) pacing threshold < 1V, ii) R wave amplitude > 6mV and lead  
370 impedance < 1500  $\Omega$ . Once satisfactory lead and pacing parameters were confirmed the ICD  
371 lead was connected to the ICD can and secured in position using 2.0 silk suture where it  
372 entered the jugular vein. The latter minimizes the risk of dislodgment. Any excess lead length  
373 was wrapped in loose loops around the ICD can before being positioned inside a  
374 subcutaneous pocket created above the jugular distally to the original incision towards the  
375 right shoulder. The pocket was securely closed using Vicryl 2.0 sutures. To avoid inappropriate  
376 shocks, the device was configured to only detect the following zones: VT, VF and Fast VT  
377 zones). In this ovine model, inappropriate detection has been observed as high sinus  
378 tachycardia rates and T wave over-sensing, therefore the device was programmed purely for  
379 detection. The defibrillator is then set to emergency mode for the duration of the surgery,  
380 allowing for fast defibrillation when intra-operative ventricular arrhythmias.

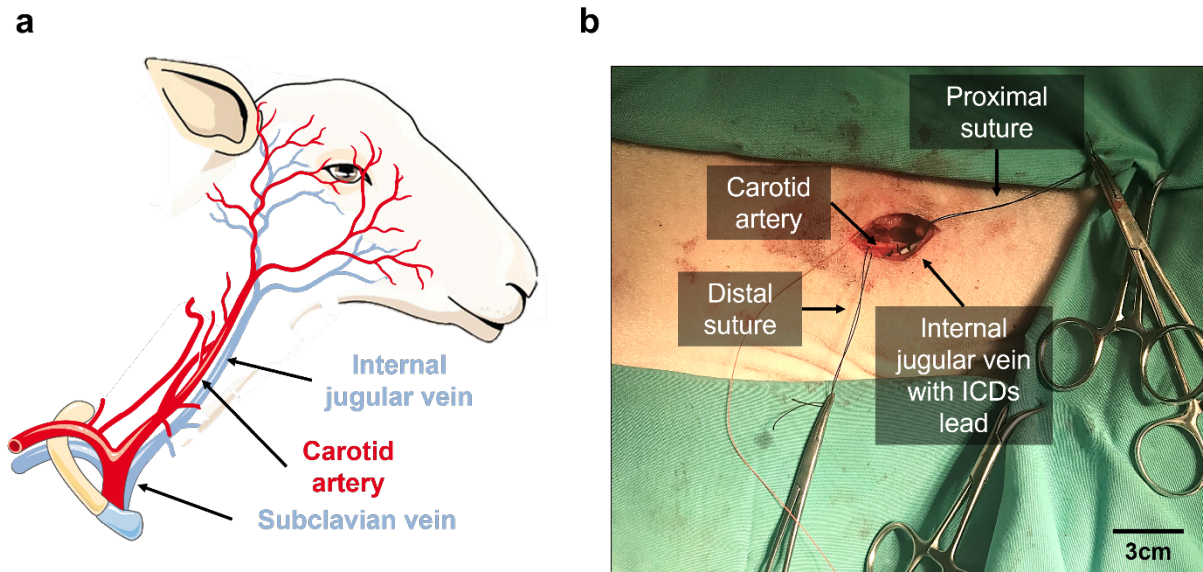

381  
382 **Fig. 6 – Intraoperative images of surgery.** a, Schematic of the isolated vessels in the sheep  
383 neck. b, Picture of the surgical site (right side of neck) shaved and cleaned, showing the  
384 incision with sutures placed on the distal and proximal aspect of the carotid artery.

385

### 386 Induction of myocardial infarction

387 Access to the arterial circulation was obtained via the carotid artery which was identified at the  
388 start of the surgery. The originally placed 2.0 suture at the proximal end of the vessel was  
389 secured. Using the Seldinger technique<sup>67</sup>, the carotid was punctured with a 14-gauge cannula.  
390 A soft curved tip guidewire (Abbott, USA) was then inserted through the cannula and advanced  
391 into the arterial lumen. The guidewire was securely held in place whilst the cannula was  
392 withdrawn. A 12 cm 6Fr haemostatic introducer sheath (Abbott, USA) was passed over the  
393 guidewire into the lumen. The guidewire was withdrawn, leaving the introducer sheath in the  
394 vessel. The sheath was loosely secured with a suture placed into the surrounding soft tissue  
395 to avoid displacement due to carotid pulsation. 10,000 IU of heparin sodium (Wockhardt Ltd.,  
396 India) was injected as a bolus, and the IV maintenance fluid at the right posterior limb cannula  
397 was switched for one containing 0.9% NaCl IV infusion at 10 IU heparin per mL. The  
398 medication protocol including the prophylactic anti-arrhythmic drug regime is demonstrated in  
399 Fig. 7.

400

401 A 6Fr Judkins right (JR4) catheter (Runway, Boston Scientific Quincy, USA) was preloaded  
402 with a 0.35mm J tip wire (Cordis, USA or Abbott, USA) and advanced through the introducer  
403 sheath to the aortic valve level under fluoroscopic guidance leading with the J-tipped wire.

404 The wire was then removed, and the left main stem (LMS) was engaged with a 50:50 mix of  
405 radiocontrast agent (Visipaque™, GE Healthcare Inc., USA; 270 mg/mL) and 0.9% NaCl  
406 solution injected through the sheath catheter. A coronary angiogram was performed to opacify  
407 the left coronary system. The left coronary system consisted of the left main stem which  
408 bifurcates into the left circumflex (LCx) and left anterior descending (LAD) coronary artery,  
409 also known as the left homonymous in sheep<sup>17,61–63</sup>. The LCx supplies the posterior and lateral  
410 free walls of the left ventricle (LV) whereas the LAD supplies the anterolateral, septal and  
411 apical walls of the LV<sup>62,64,65</sup>. Upon identification of the LAD, a hydrophilic 0.014-inch guidewire  
412 (Abbott, USA) was advanced to the distal LAD. Depending on the calibre of the vessel, an

413 appropriately sized intracoronary balloon catheter (Apex Monorail or Emerge™, Boston  
414 Scientific, MA, USA) was advanced and positioned within the LAD, after the second diagonal  
415 branch (D2; Supplemental Figure SI). The length of the intracoronary balloon used was 20 –  
416 40 mm with a width ranging from 2 - 2.75 mm depending on the coronary anatomy and calibre  
417 determined empirically during coronary angiography using the Judkins catheter diameter as a  
418 guide. The balloon catheter was inflated to the specified recommendations using an Indeflator  
419 (BasixCompak inflation device, Merit Medical, USA) with a repeat coronary angiogram  
420 thereafter confirming complete occlusion of flow distal to the inflated balloon (Fig. 6;  
421 Supplemental Figure SI). The balloon remained inflated for 90 minutes occluding blood flow  
422 distal to the balloon, thus creating the infarct.

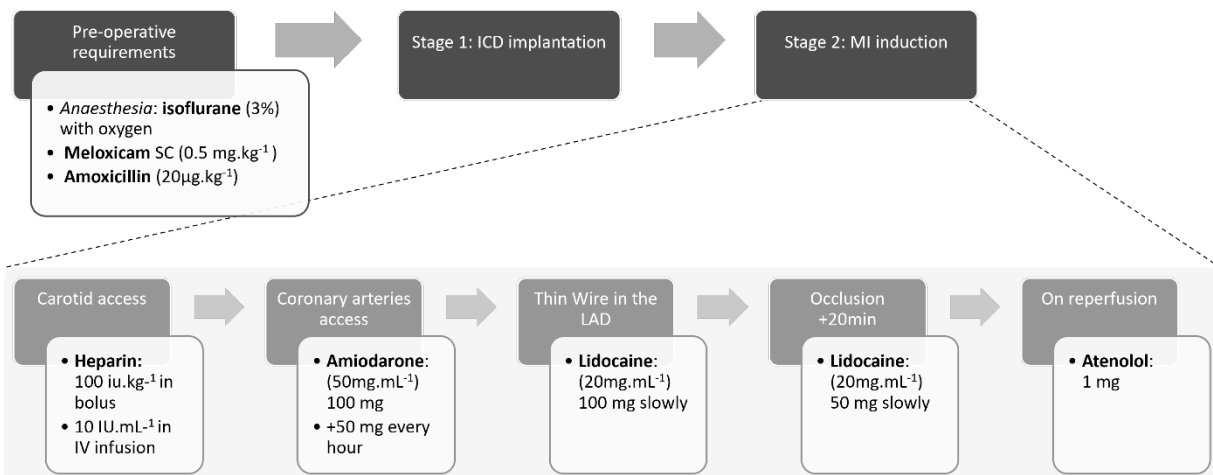

423  
424 **Fig. 7 - Drug protocol for MI induction surgery.** Diagram of the timings of medications  
425 administered during MI induction surgery. Internal cardiac defibrillator (ICD) device; anterior  
426 descending artery (LAD).

427 ECG and intracardiac electrogram (via ICD) parameters were continuously monitored for the  
428 presence of ST elevation, T wave changes and conduction abnormalities and ventricular  
429 arrhythmias. ST segment changes were usually observed within minutes of coronary occlusion  
430 with evidence of additional ventricular activity seen approximately 30 - 40 minutes into the  
431 occlusion. These ranged from the occasional ventricular ectopic (VE) beats to VF requiring  
432 defibrillation. In the event of a persistent ventricular arrhythmias such as VT or VF, the animal  
433 would be promptly defibrillated via the ICD to terminate the arrhythmia.



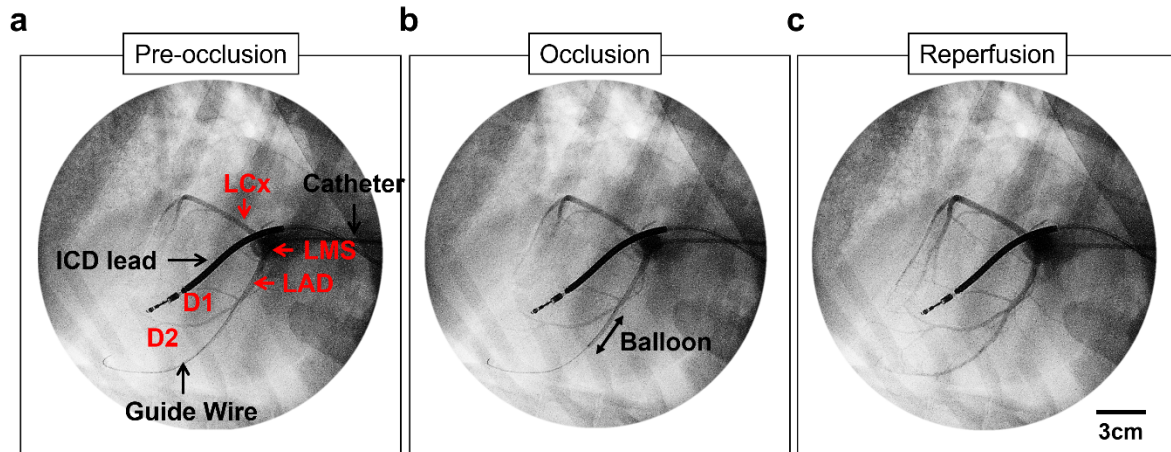

434  
435 **Fig. 8 - Fluoroscopic images during MI induction surgery.** a, Angiogram of the left  
436 coronary system showing the left main stem (LMS) bifurcating into the left anterior descending  
437 (LAD) and left circumflex (LCx) coronary artery. The ICD lead is also seen within the RV. b,  
438 Repeat coronary angiography with an inflated intracoronary balloon occluding flow distal to  
439 the balloon. c, Confirmation of the correct reperfusion of the heart. D1 and D2, diagonal branches.  
440 RA, right atria. RCA, right common coronary artery. Videos in supplemental material  
441 (Supplemental material S1)

442 90 minutes after inflation the balloon was deflated and coronary blood flow distal to the  
443 occlusion site was confirmed with a repeat coronary angiogram Fig. 8. The intracardiac  
444 equipment and sheath were removed. The distal carotid artery was tied off with a 2.0 silk  
445 suture. The wound was closed in three layers, closing the muscular fascia, the subdermal  
446 tissue and finally the cutaneous layer. During the wound closure, the isoflurane concentration  
447 was gradually reduced from 3% to 0%. The endotracheal tube was left in place until the animal  
448 showed the signs of a rejection reflex (i.e., swallow or cough). The recovery from anaesthesia  
449 was closely monitored for evidence of respiratory distress and arrhythmias. The IV catheter  
450 was left in place until the animal was fully awake to allow immediate IV access. Once the  
451 animal was alert and all vital signs were within normal range, it was placed in a single housed  
452 post-operative recovery pen in full sight and communication with its peers and was given  
453 access to food and water.

454 The animal was closely monitored during the recovery period. It was considered fully  
455 recovered from anaesthesia when visibly alert, standing and having urinated. After 24h of  
456 post-operative recovery housing the animal was returned to group housing. No further  
457 intervention was carried out for at least three days to ensure complete recovery from surgery  
458 as well as to allow the ICD lead to settle in its intracardiac position. Animal weight, well-being  
459 and wound healing were monitored regularly to ensure adequate post-operative recovery.

460 **In vivo assessments.** To assess the evolution of various clinical and cellular parameters over  
461 time following MI, the animals were randomly divided into three groups: 3-day MI, 1 - 1.5 week  
462 MI, and 8 week MI. As shown in Fig. 9, *in vivo* measurements were performed at baseline,  
463 post-operatively, and at the endpoint. There were two types of evaluations performed: full  
464 assessments and expedited assessments. The full *in vivo* assessment included measurement  
465 of weight and blood pressure, recording of electrocardiograms (ECG), imaging using  
466 transthoracic echocardiography (TTE), blood sampling, and external interrogation of an  
467 intracardiac device once implanted. The expedited assessment only involved blood sampling  
468 and the device interrogation.

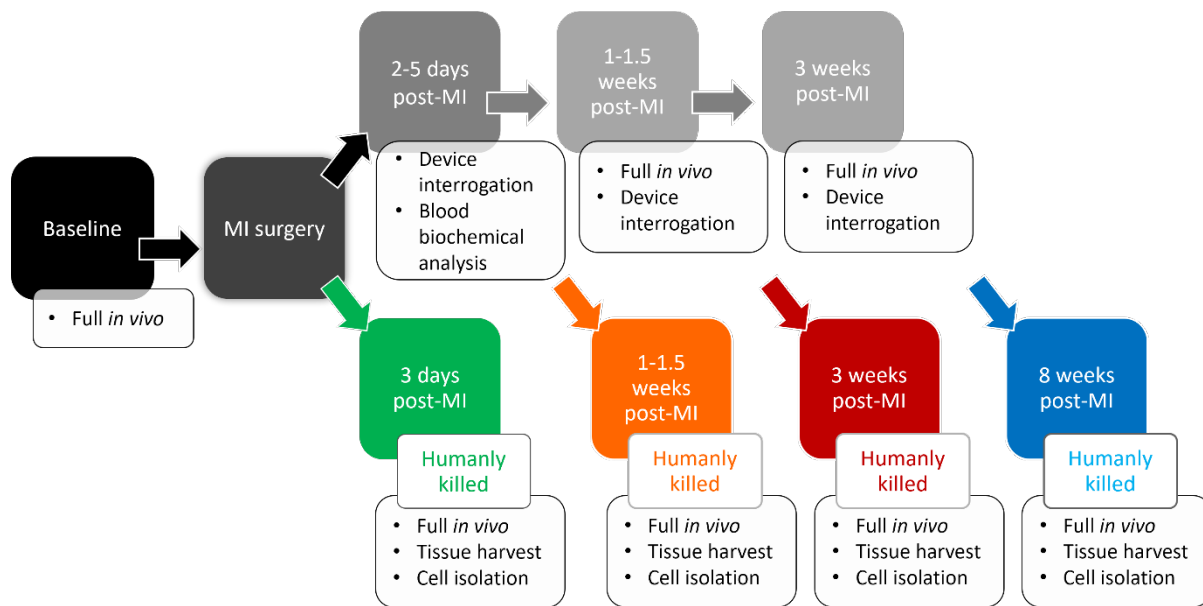

469

470 **Fig. 9 - *In vivo* schedule for 8 week, 3 week, 1-1.5 week and 3 day MI animals.** The full *in*  
471 *in vivo* assessment included measurement of weight and blood pressure, recording of  
472 electrocardiograms, imaging using transthoracic echocardiography, blood sampling, and  
473 external interrogation of an intracardiac device once implanted.

474

#### 475 **Blood sampling**

476 Blood was collected pre-operatively, at multiple time points intraoperatively (carotid artery  
477 access, pre-occlusion, 30min post-reperfusion and 90min post-reperfusion), at 2 - 5 days, 1 -  
478 1.5 weeks and 8 weeks. Venous blood sampling was performed preferably from the right  
479 jugular vein with the animal gently restrained using a sterile aseptic non-touch technique.  
480 Alternative sampling sites included the left jugular vein or cephalic veins. The skin was shaved  
481 and aseptically cleansed before sampling. Amongst the blood parameters evaluated were  
482 whole blood cTnI (VetScan i-STAT, Abaxis, UK) as a marker of myocardial necrosis along with  
483 a full biochemistry profile (Skyla VB1 Analyser, Woodley, UK). The full profile is shown in  
484 Supplement (Supplemental Table 1). The cTnI was tested using a point-of-care testing  
485 system, which provided a result within 10 minutes.

486

#### 487 **Transthoracic echocardiography**

488 In the same seated position, under gentle restraint, transthoracic echocardiography (Vivid, GE  
489 Healthcare, USA) was performed with the probe positioned on the right side of the chest with  
490 the right forelimb lifted, providing access to the thorax. Image quality was optimised by shaving  
491 the chest and using an ultrasound transmission gel (Aquasonic, Germany) for better contact.  
492 As limited views were available, parasternal short (SA) and long (LA) axis views were obtained  
493 to allow evaluation of the cardiac structure and function. For adequate visualization of the LV  
494 walls and endocardial borders, the apical views (2, 4 and 5 chamber views) would have been  
495 ideal. However, the anatomical position of the heart and wide sternum in sheep makes this  
496 difficult to obtain<sup>56</sup>. The SA-mid view was taken below the mitral valve level where the papillary  
497 muscles were visible. The SA-distal view was the most distally obtainable short axis image of  
498 the LV to visualize the apex and adjacent region. In humans, regional wall motion

499 abnormalities can be assessed using a 17-segment ECHO model where the LV walls are  
500 divided into 17 segments which can be correlated to the blood supply<sup>57,58</sup>.

501 For the analysis, images were exported and converted from DICOM to JPEG format using  
502 Microdicom Viewer (Microdicom, Bulgaria). The JPEG files were opened in Fiji ImageJ  
503 (National Institutes of Health, USA) and multiple measurements were taken.

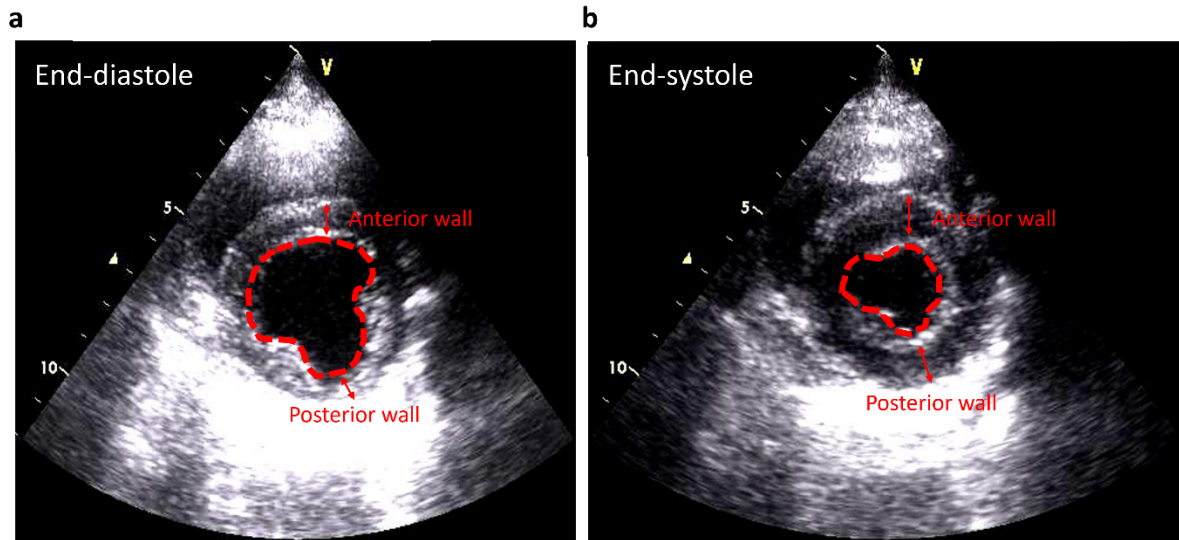

504  
505 **Fig. 10 – Measurements from ECHO SA-mid views.** Frames from the LV short axis views  
506 at mid-level in diastole **a**, and systole **b**, with the anterior and posterior wall thickness  
507 measurement sites (marked by red arrow) as well as the LV cavity area measurement  
508 (outlined in red-dotted line) shown.

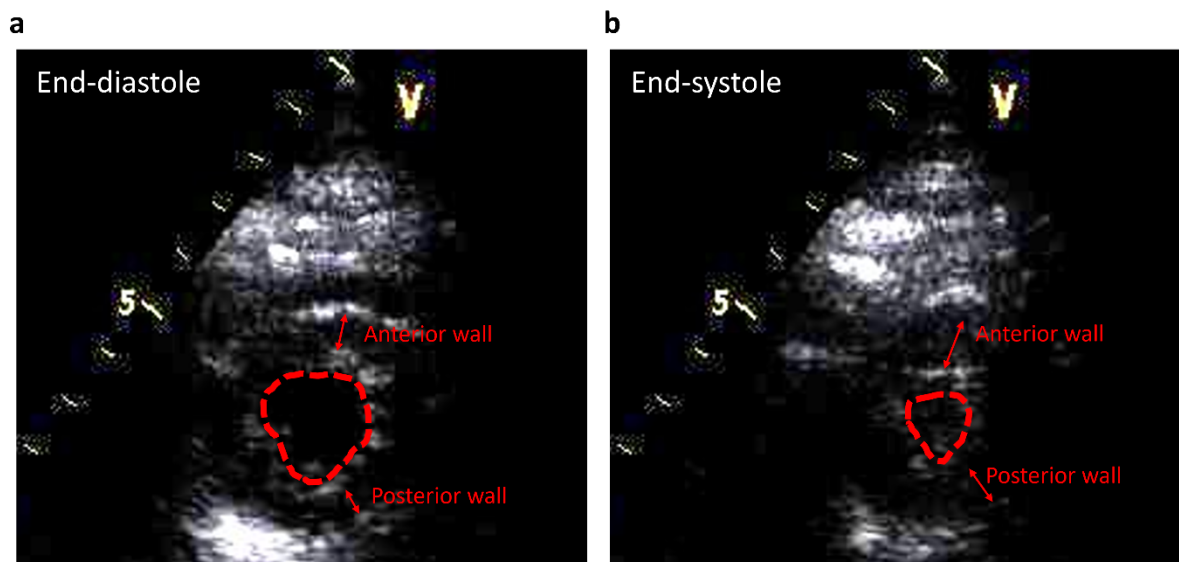

509  
510 **Fig. 11 – Measurements from ECHO SA-distal views.** Frames from the LV short axis views  
511 at distal-level in diastole **a**, and systole **b**, with the anterior and posterior wall thickness  
512 measurement sites (marked by red arrows) as well as the LV cavity area measurement  
513 (outlined in red-dotted line) shown.

514 In the SA-mid and SA-distal images, the anterior wall thickness measurement represented the  
515 infarcted region, and the posterior wall thickness represented the non-infarcted region (Fig.  
516 10 and Fig. 11). Prior to the surgery, measurements were also taken from these identical sites

517 to serve as baseline values. The fraction of wall thickness change (FWTC) was calculated  
518 using Equation 1 to determine the difference in wall thickness between the infarcted and the  
519 non-infarcted region. In order to assess the fractional area change (FAC) as a measure of  
520 contractile function, the LV cavity area (Fig. 10 and Fig. 11) was also measured at mid and  
521 distal LV levels in systole and diastole and calculated using Equation 2.

522

$$523 \quad \text{Fraction of wall thickness change} = \frac{(\text{Non infarcted} - \text{Infarcted})}{\text{Non infarcted}}$$

524

525 **Equation 1 Fraction of wall thickness change**

526

$$527 \quad \text{Fractional area change} = \frac{(\text{Diastolic area} - \text{Systolic area})}{\text{Diastolic area}} \times 100$$

528

529 **Equation 2 Fractional area change**

530 From the parasternal long axis (PLAx) images, the interventricular septal (IVS) thickness, LV  
531 end diastolic (LVEDD) and systolic diameter (LVESD) as well as the LV posterior wall (LPW)  
532 thickness were measured in diastole and systole as shown in Fig. 12. Due to the limited  
533 obtainable views in the sheep, estimating the LV function was challenging particularly in the  
534 presence of an apical infarct. Therefore, an adaptation of the simplified Quinones equation  
535 produce by MD Math available from the Canadian Society of Echocardiography<sup>59</sup> was used  
536 deriving an estimated ejection fraction (EF) from the LVESD, LVEDD and an apical contractility  
537 estimate seen from the SA-distal views using Equation 3. In this equation, the K value (Table  
538 1) represented the apical contractility. Additionally, fractional shortening (FS) was also  
539 calculated as another measure of contractile function using Equation 4 and expressed as a  
540 percentage.

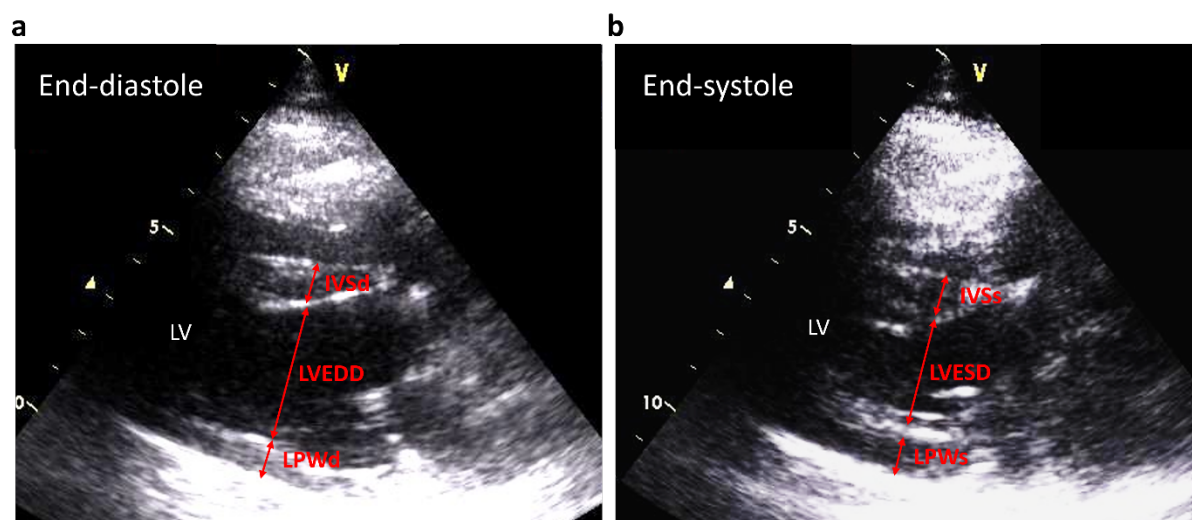

541

542 **Fig. 12 – Measurements from ECHO PLAX views.** Frames from the PLAX views in diastole  
543 **a**, and systole **b**, with the interventricular septal thickness (IVS) (yellow arrows), LV end  
544 diastolic (LVEDD) and systolic diameter (LVESD) (blue arrows) and left posterior wall  
545 thickness (LPW) (orange arrows). For IVS and LPW measurements, the letter s or d at the  
546 end denote measurements taken in systole or diastole, respectively.

547

548

| Apical contraction | K value (%) |
|--------------------|-------------|
| Normal             | +10         |
| Hypokinetic        | +5          |
| Akinetic           | 0           |
| Dyskinetic         | -5          |
| Apical aneurysm    | -10         |

549 **Table 1 - K values.** Apical contractility measurements expressed as percentages, used in  
550 Equation 2.4

551

552 
$$Ejection\ Fraction\ (EF) = \frac{LVEDD^2 - LVESD^2}{LVEDD^2} \times 100 + K$$

553

554

**Equation 3 Ejection fraction**

555

556

557 
$$Fractional\ shortening\ (FS) = \frac{LVEDD - LVESD}{LVEDD} \times 100$$

558

559

**Equation 4 Fractional shortening**

560

### 561 **Electrocardiography**

562 Surface electrocardiograms were recorded at intervals. Peri-operative ECG recordings (EMKA  
563 Technologies, USA) were performed in the seated position using 5 surface electrodes in an  
564 orthogonal arrangement on shaved and cleaned sites to allow better contact. The identical  
565 electrode position is used again intraoperatively but the animal is laid on its left-hand side  
566 during surgery. Upon connecting electrodes, the animal was allowed some time to settle thus  
567 minimizing any potential stress-related ECG changes<sup>60</sup> or motion artefacts. A 10-minute ECG  
568 was then recorded through IOX software (EMKA Technologies, France)

569 For the analysis, the files were opened in ECG Auto (EMKA Technologies, France) and  
570 converted text file (\*.TXT) format to allow the files to be opened on Labchart (AD Instruments,  
571 UK). The recordings were smoothed and filtered to reduce noise and breathing artefacts using  
572 a 21-point (Bartlett) window and a 2 Hz high pass or 50 Hz notch filter.

573 The software generated multiple averaged traces consisting of 10 consecutive beats over the  
574 1-minute selected recording period where intervals could be manually selected.

575

576 **Euthanasia.** The humane killing of MI sheep was carried out as per the approved regulated  
577 procedure and schedule 1 protocol in accordance with ABPA regulations with an anaesthetic  
578 overdose (pentobarbitone sodium, 200 mg/kg intravenously) followed by permanent  
579 cessation of circulation. Humane killing was performed at three predetermined timepoints post  
580 MI: 3 days, 1.5 weeks and 8 weeks post-MI.

581 **Statistical analysis.** All data is expressed as the mean  $\pm$  SEM. Statistical analysis was  
582 performed using Prism 7 (GraphPad Software, San Diego, California). Data were first tested  
583 for normality using Shapiro-Wilk, Kolmogorov-Smirnov, Anderson-Darling, and D'Agostino-  
584 Pearson omnibus in GraphPad Prism. Where data were not normally distributed, data were  
585 transformed using, natural log,  $\text{Log}_{10}$ , reciprocal, square root or exponential depending on  
586 skew<sup>67</sup>. Normally distributed data were analysed using the t-test, one way ANOVA, repeated  
587 measures one way ANOVA and mixed effects model analysis. Where data was not normally  
588 distributed despite transformation, an equivalent non-parametric test was used. The  
589 relationship between two variables was determined using simple linear regression and the  
590 correlation was evaluated using Pearson's correlation (provided by the r value). Data was  
591 considered significant if the p value was  $< 0.05$  and is described in the text.

592  
593  
594

595 **Data Availability**

596

597 The data supporting this manuscript are available from the corresponding author on  
598 reasonable request.

599

600

601 **Acknowledgements**

602

603 The authors wish to acknowledge support from The British Heart Foundation (IG/15/2/31514;  
604 FS/17/52/33113 & FS/20/6/34990) and Medical Research Council (MR/K50028231/1).

605

606 For the purpose of open access, the author has applied a Creative Commons Attribution (CC  
607 BY) licence to any Author Accepted Manuscript version arising from this submission.

608

609

610 **Ethics Statements**

611

612 The authors have no financial or competing interests to declare

613

614

615 **Author Information**

616

617 AWT conceived the experiments and secured all funding. CP led the model development  
618 and performed all analyses. All authors contributed to surgical and in vivo procedures. CP,  
619 BN and AWT drafted the manuscript. All authors approved manuscript contents.

620

621 **Step by step guide**

622 **MATERIALS**

623 **Animals**

- 624 • Young, treatment naïve Welsh Mountain sheep (aged  $\sim 18 \pm 6$  months) with an average
- 625 weight  $38.5 \pm 1.2$ kg
- 626 • Group housed, fed hay and water ad libitum and maintained in a 12 hour light/12 hour
- 627 dark cycle for a minimum of 1 week prior to surgical intervention.

628

629 **Reagents**

- 630 • Lignocaine local anaesthesia throat spray (Xylocaine, Astra Zeneca, UK)
- 631 • x3 Heparin 10,000 IU in 10 ml vials (Wockhardt, UK)
- 632 • Contrast medium – Iohohexol (Omnipaque 300, GE Healthcare, USA)
- 633 • x3 Sodium chloride 0.9% 500mls and 1000mls (Baxter, USA)
- 634 • Prophylactic antibiotics (Amoxicillin  $15 \text{ mg kg}^{-1}$ ) (Norbrook, UK)
- 635 • Prophylactic analgesia meloxicam ( $0.05 \text{ mg kg}^{-1}$ ) (Norbrook, UK)
- 636 • Amiodarone (Hameln, UK)
- 637 • Lidocaine (Hameln, UK)

638

639 **Premedication and Anaesthesia**

- 640 • 1-chloro-2,2,2-trifluoroethyl difluoromethyl ether (isoflurane, Santa Cruz
- 641 Biotechnology, USA)
- 642 • Oxygen and nitrous oxide (50:50) mix (BOC Healthcare, The Linde Group, Germany)
- 643 • Cone face mask rubber large

644

645 **Equipment**

- 646 • Hypodermic needle variable sizes 18, 20, 22G (BD Microlance, UK)
- 647 • 5ml, 10ml, 20ml and 50ml syringe (BD Plastipak, UK)
- 648 • IV infusion set (CareFusion, USA)
- 649 • 14G & 20G cannula (BD Venflon, USA)
- 650 • Blood pressure cuff and machine (Mindray, Australia)
- 651 • Pulse oximeter sensor (Mindray iMEC8 Vet Manuals, Mindray Bio-Medical Electronics
- 652 Co., China)
- 653 • 5 lead ECG cable with crocodile clips and recording equipment, IOX software (EMKA
- 654 Technologies, France)
- 655 • iSTAT Vetscan Hand held analyser and cTni cartridges (Abaxis, UK)
- 656 • Ultrasound transmission gel (Aquasonic, Germany)
- 657 • GE Vivid 7 echocardiography machine with 5S cardiac transducer (General Electrics,
- 658 USA)
- 659 • Skyla VB1 Biochemistry analyser (Woodley, UK)
- 660 • C-arm fluoroscopy machine (BV Pulsera Mobile C-arm, Philips, UK)

661

662 **Intubation** (see Fig. 13 – Typical surgical equipment. a, Intubation equipment. b, Surgical

663 tray.

- 664 • Miller laryngoscope blade size 4
- 665 • Stiff endotracheal stylet



- 666 • Cuffed endotracheal tube (size 8.5 to 10; J.A.K Marketing, UK)
- 667 • 20mL syringe (BD Plastipak, UK)
- 668 • The ribbon to tie the ET tube in place
- 669 • Bag valve mask
- 670
- 671 **Monitoring and anaesthesia**
- 672 • Anaesthetic machine (Zoovent, UK)
- 673 • Five-lead electrode cable with leg strips
- 674 • Electrocardiogram monitoring (IOX software, EMKA technologies,USA)
- 675 • Pulse oximeter sensor (Mindray iMEC8 Vet Manuals, Mindray Bio-Medical Electronics
- 676 Co., China)
- 677 • Blood pressure cuff sized as tail cuff and BP recording equipment (Mindray, Australia)
- 678
- 679 **Surgical site preparation, generic operative equipment & operator preparation**
- 680 • Sheep clippers
- 681 • Iodinated povidone 7.5% (Videne, UK)
- 682 • Sterile drapes
- 683 Surgical tray (see Fig. 13 – Typical surgical equipment. a, Intubation equipment. b,
- 684 Surgical tray.)
- 685 • Gallipot
- 686 • 2.0 Vicryl sutures (Ethicon,USA)
- 687 • 2.0 Silk sutures (Ethicon,USA)
- 688 • 2.0 Monocryl sutures (Ethicon,USA)
- 689 • Sterile gauzes
- 690 • Internal cardiac defibrillator
- 691 ○ Generator (Medtronic, USA)
- 692 ○ Right ventricular active fixation defibrillator leads (DF1 or DF4) (Boston
- 693 Scientific, Medtronic, USA)
- 694 ○ ICD compatible programmer with analyser cable and header (e.g. Medtronic
- 695 2090, Medtronic, Minnesota, USA)
- 696 ○ PSA cables
- 697 • MI Induction
- 698 ○ 14G cannula (BD Venflon,USA)
- 699 ○ 12cm 6Fr haemostatic introducer sheath (Abbott Medical, UK), containing the
- 700 sheath, a dilator and a mini-guidewire
- 701 ○ 6F JR4 Guide catheter (Runway, Boston Scientific, USA)
- 702 ○ Haemostasis valve (Honor,Merit Medical, USA)
- 703 ○ Indeflator (balloon inflation device) with pressure monitor (BasixCompak
- 704 inflation device, Merit Medical, USA)
- 705 ○ 50ml syringe (BD Plastipak, USA)
- 706 ○ Intracoronary balloon catheter, variable sizes 2.2 to 2.75mm diameter, 20-
- 707 40mm length (Apex Monorail, Boston Scientific, MA, USA)
- 708 ○ 0.35 J tipped guide wire (Cordis, USA)
- 709 ○ 0.0014 intracoronary guide wire (Abbott, USA)
- 710

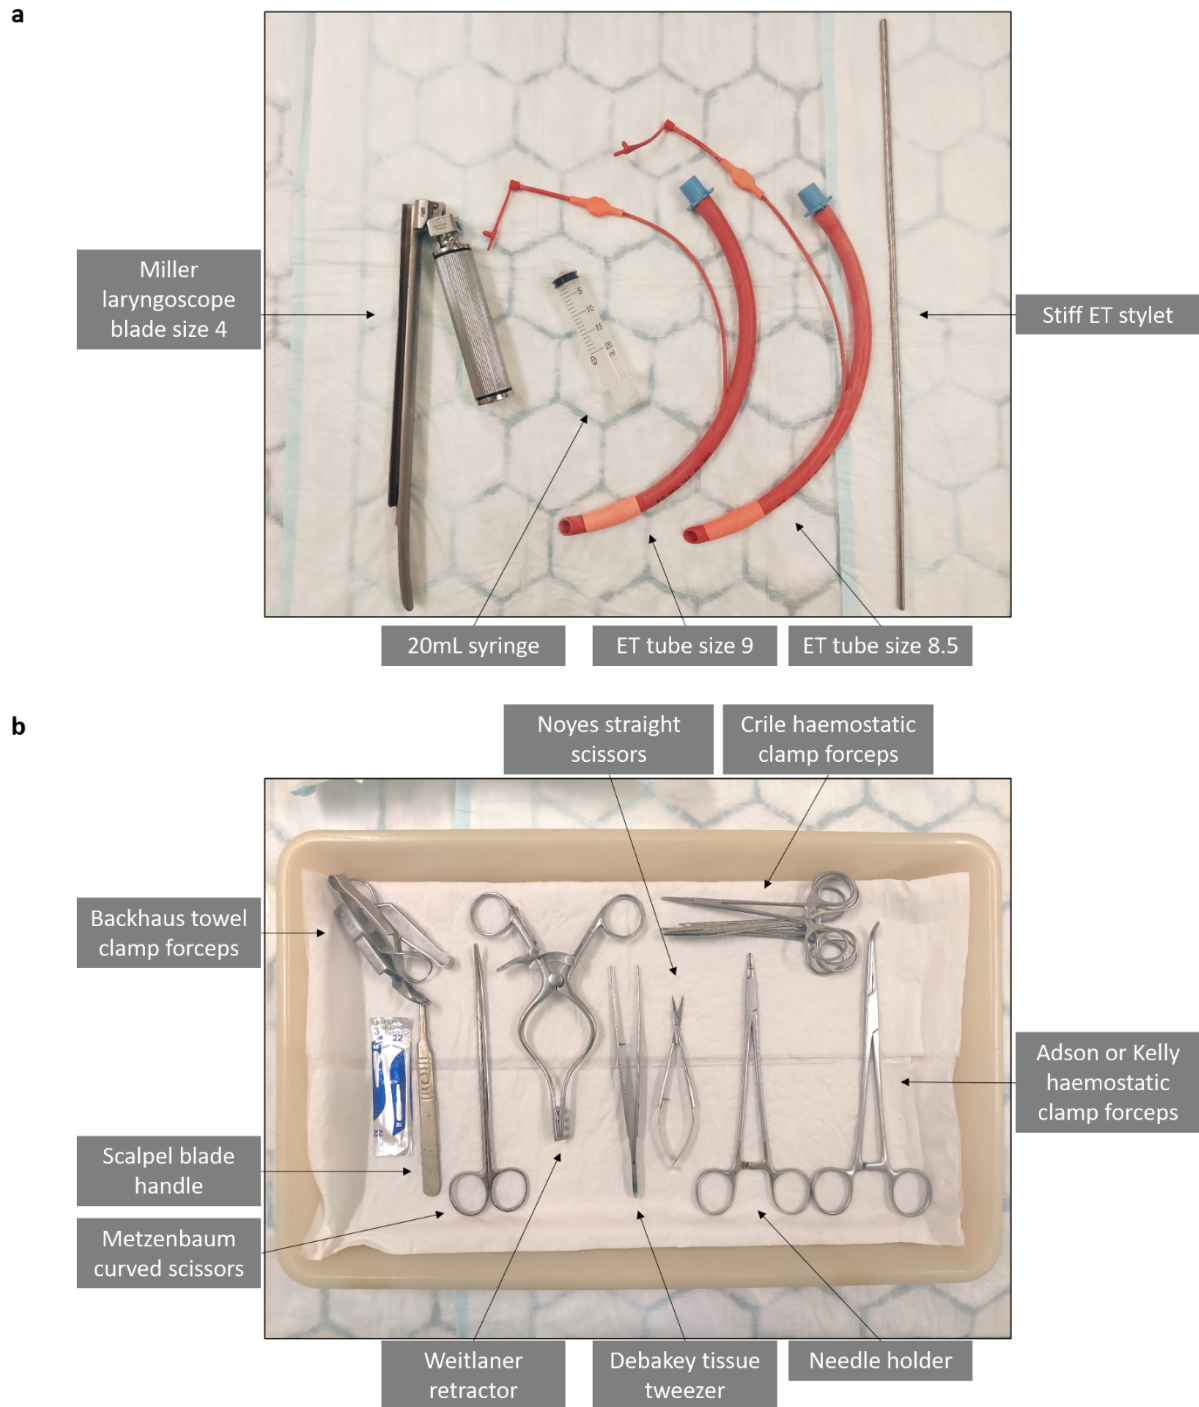

**Fig. 13 – Typical surgical equipment. a, Intubation equipment. b, Surgical tray.**

711  
712

713 **Operator preparation**

- 714 • Surgical gown
- 715 • Surgical cap
- 716 • Sterile gloves
- 717 • Surgical face mask
- 718 • Radiation protective equipment – lead gown (Kenex, UK) and thyroid collar

719

720 **Software**

- 721 • ECG recording software details

## 722 **Surgical procedure**

### 723 **A. Anaesthetic induction and preparation**

724

725  Prior to surgery, animals are given access to water but food is withheld to avoid ruminal  
726 distension.

727 1. The animal is allowed to inhale a combination of oxygen and nitrous oxide in a 50:50  
728 mix with isoflurane (3-5%).

729 2. Animal is lifted and placed on the operating table in a sternal recumbency position,  
730 with the head elevated.

731 3. With the aid of a second operator, the jaw is opened with the head supported to allow  
732 the primary operator to spray two puffs of local anaesthetic (Lidocaine throat spray)  
733 into the back of the throat.

734 4. The facemask delivering oxygen nitrous 50:50 with isoflurane is replaced in  
735 preparation for intubation.

736 5. The facemask is removed and the jaw is held open with the head supported by the  
737 second operator. A laryngoscope is introduced and the vocal cords visualised.

738 6. A stiff stylet is taken down to the level of the vocal cords. An appropriately sized  
739 endotracheal tube is advanced over the stylet past the vocal cord and the stylet is  
740 removed. The cuff is inflated with air using a 20mL syringe and the tube is connected  
741 to a bag mask to confirm the appropriate tube placement in the trachea. The tube is  
742 then connected to the ventilator. The appropriate tube placement is confirmed by  
743 appropriate chest wall movement with the ventilator, saturation recordings, and the  
744 maintenance of anesthesia, and the tube is secured with the tie around the jaw.

745  When advancing stylet, due care is taken not to advance the stylet too far to avoid  
746 damage to soft tissue or larynx. Adequate visualisation of vocal cords is required to  
747 ensure safe placement.

748 7. The animal was positioned in lateral recumbency for the rest of the procedure.

749 8. All monitoring equipment (saturations monitoring, ECG monitoring, and BP monitoring)  
750 is connected.

751 9. A 20G cannula is sited on the right hind leg for the purposes of administration of  
752 intraoperative medications. Pre-operative antibiotics and analgesia are administered  
753 at this stage.

754 10. The right side of the neck is shaved, providing a wide surgical field.

755 11. The skin is cleaned twice with an iodine-based antiseptic and draped.

756 12. Anatomical landmarks are palpated to delineate the jugular groove.

757 13. A 5 to 7cm incision is made to the skin with a blade within the jugular groove. The  
758 incision site is located two thirds of the way from the angle of the jaw to the shoulder  
759 tip. This is followed by blunt dissection down to identify the jugular vein.

760 14. The jugular vein is identified and freed. A proximal and distal 2.0 silk suture is placed  
761 loosely on the vessel. These ties are clipped onto the drapes using the Crile (?artery)  
762 forceps.

763  Gentle dissection is performed to free the jugular vein and carotid artery to avoid  
764 vascular damage. The vagal nerve must be gently freed from the carotid artery.

765 15. Further blunt dissection is performed deeper to identify the carotid artery, which runs  
766 alongside the vagus nerve. The carotid artery is freed from the vagus nerve and  
767 similar proximal and distal 2.0 silk sutures are placed and clipped to the drape loosely.

768  
769 The procedure is carried out in two phases. The first stage involves implantation of an internal  
770 cardiac defibrillator to manage intraoperative life-threatening ventricular arrhythmias and the  
771 second stage is the induction of MI.

## 772 **B. Implantation of an internal cardiac defibrillator (ICD)**

- 773 1. The proximal jugular vein suture is tied off.
- 774 2. The mobile C-arm of the fluoroscopy machine is moved into position over the heart  
775 in the postero-anterior position.
- 776 3. With Noyes scissors, a venotomy is performed, exposing the inner lumen of the  
777 vessel.
- 778 4. With the aid of a vein pick, the vein is kept open and an active fixation RV lead, with  
779 a straight stylet in position, is advanced down to the right ventricular apex under  
780 fluoroscopy guidance. Due caution is taken when advancing the lead and lead  
781 advancement is stopped if there is any resistance.
- 782 5. As the lead crosses the tricuspid valve and is advanced into the RV, the ECG is  
783 monitored for the presence of ventricular ectopics suggestive of crossing the valve  
784 into the RV.

785  Advancement of the lead is performed cautiously across the tricuspid valve. If the lead  
786 does not directly cross the valve, the lead is prolapsed with the stylet retracted ~5cm -  
8cm followed by straightening out the lead with the stylet fully inserted.

- 787
- 788
- 789 6. Once at the RV apex, the active fixation lead is deployed by applying clockwise turns  
790 on the proximal end of the lead to screw in the lead.
- 791 7. With the analyser connected to the distal end of the lead, the lead parameters are  
792 tested in the bipolar configuration. Target parameters include an R wave > 6mV, an  
793 impedance value between 300–1500Ω and a pacing threshold of <1V.
- 794 8. The lead is secured with 2.0 silk ties at the proximal and distal lead cuffs. The distal  
795 cuff is secured with the jugular vein simultaneously achieving vein closure and  
796 haemostasis.
- 797 9. The lead is connected to the appropriate port of the generator.

- 798 10. The subcutaneous pocket for the generator is created. The site needs to be  
799 sufficiently distal to the original incision towards the shoulder. The generator with the  
800 residual lead coiled is placed into the pocket.
- 801 11. The pocket is closed with interrupted 2.0 Vicryl sutures.
- 802 12. The VT, VF and FVT zones are programmed for detection only and all therapy is  
803 turned off. The rationale behind this is to avoid inappropriate shocks as the higher  
804 sinus rates and T wave oversensing in the model.
- 805 13. The device is then left connected wirelessly to the programmer in the emergency  
806 mode to allow prompt defibrillation of intra-operative life-threatening ventricular  
807 arrhythmias.
- 808

### 809 **C. Induction of myocardial infarction**

810

811   
812

All the MI induction equipment (except the indeflator and the balloon) listed above should be pre-flushed with heparinised saline solution (i.e., 500mL sodium chloride 0.9% solution containing 10,000 IU heparin prepared in a sterile kidney dish) and prepared as follows:

813

814

815

- Insert the dilator into the 6 Fr haemostatic introducer sheath.
- Connect the 6F JR4 guide catheter to the Honor® Hemostasis Valve, which is connected to a 3-way valve, and then insert the 0.35 J tipped guide wire through the Hemostasis Valve all the way to the end of the catheter.

816

817

818

1. The previously identified carotid artery is the vascular access site for this part of the procedure.
2. The proximal suture is tied off.
3. The vessel is controlled with the previously placed proximal and distal ties.
4. A 14G cannula is advanced into the carotid artery towards the distal end.

819

820

821

822

823

824 

The cannula is cautiously inserted to remain intraluminal and avoid transecting the carotid artery.

825

5. Once intravascular access is achieved, the x short guide wire is advanced down the cannula and exchanged for the 6F 12cm haemostatic sheath using the Seldinger technique.
6. The sheath is loosely secured via the side loop to prevent displacement secondary to the carotid pulsation.
7. Upon achieving arterial access, a 10,000 IU bolus of IV heparin is administered followed by a maintenance infusion of 10IU/ml to reduce the risk of thrombotic complications with the indwelling arterial equipment.
8. 30 minutes prior to coronary access, amiodarone 100mg IV is administered followed by a maintenance bolus dose of 50mg/hour.
9. Via the introducer sheath, a 6F Guide Judkins Right (JR4) catheter is advanced with a pre-loaded wire 0.35 in 150cm J wire. This is introduced under fluoroscopic guidance with the J wire leading to reduce vascular trauma.
10. The J wire is advanced down to the aortic valve. When it reaches the aortic valve, mild resistance should be felt, which corresponds to the J wire looping at the valve level.
11. Then the guide catheter is advanced over the wire down to the aortic valve level and the wire is removed.

826

827

828

829

830

831

832

833

834

835

836

837

838

839

840

841

842

- 843 12. A 50ml syringe with 50% contrast mix is connected to the end of the guide catheter.  
844 13. Using fluoroscopic guidance, the catheter is advanced into the left coronary system  
845 with catheter motion and contrast injection used to confirm/identify position.
- 846  Engagement of left coronary artery system is done gently under direct fluoroscopic  
847 guidance observing catheter tip motion and a gentle contrast injection to ensure the  
848 ostium of the vessel is not dissected and to avoid deep intubation of the coronary.
- 849 14. Once engaged adequately, coronary angiography is performed with the 50% contrast  
850 mixture to delineate the left coronary anatomy identifying the LAD coronary artery and  
851 the second diagonal branch (D2). This will guide identification of the occlusion target  
852 which is in the LAD after the D2 branch.
- 853 15. A bolus dose of 100mg Lidocaine is administered intravenously 20-30 minutes prior to  
854 coronary occlusion via the peripheral cannula.
- 855 16. Coronary engagement is maintained with the guide catheter, whilst a 0.0014 in wire  
856 (normal length wire) is advanced down to the distal LAD. The wire is introduced into  
857 the haemostasis valve via the introducer needle provided in the set.
- 858  The wire is advanced gently under fluoroscopic guidance to avoid coronary  
859 perforation. Avoid buckling the wire tip as it is advanced.
- 860 17. The indeflator is prepared with the 50:50 contrast and heparinised saline solution mix.  
861 For this, the chamber of the indeflator is filled with the mixture by aspiration, then the  
862 handle is turned clockwise to expulse the fluid, removing any leftover bubbles and  
863 leaving the mixture bubble-free.
- 864 18. Depending on the approximated diameter of the vessel (which is determined by  
865 comparing the vessel calibre to the guide catheter, which represents a width of  
866 approximately 2 mm), an appropriate size intracoronary balloon is selected.
- 867 19. The balloon's chamber is filled with contrast to ensure there is no air and is connected  
868 to the indeflator. A vacuum is created by adding negative pressure and holding it in  
869 place to empty the balloon and ensuring that there is no air within. The vacuum must  
870 be maintained during the balloon's introduction.  
871
- 872  Ensure that the device is undamaged.  
873 Do not pre-inflate or test the balloon before insertion.
- 874  
875 20. The protective sleeve is removed from the balloon. The balloon catheter has a central  
876 lumen, which allows it to be advanced over the 0.0014 in wire.
- 877 21. The 0.0014 in wire is fixed in the distal LAD and the intracoronary balloon is advanced  
878 to the target site of occlusion over this wire whilst maintaining the distal position of this  
879 wire at all times.
- 880  As the balloon is advanced, it is critical to hold in place the thin wire, so it does not  
881 cause coronary trauma or perforation by inadvertent advancement.
- 882  
883 22. The indeflator is used to inflate the intracoronary balloon at the target occlusion point  
884 within the LAD (i.e., immediately after the D2 vessel bifurcates). The contrast mixture  
885 is filled into the intracoronary balloon by the indeflator, resulting in the occlusion.

886  Inflation of the intracoronary balloon is performed slowly to ensure adequate but not  
887 excessive inflation which can cause coronary artery damage.

888 23. A coronary angiogram is performed to confirm that there is no visible flow of contrast  
889 distal to the occlusion point suggesting adequate balloon inflation and this inflation is  
890 maintained for a 90-minute duration.

891 24. A further bolus intravenous dose of 50mg Lidocaine is administered via the peripheral  
892 cannula at 20 minutes post occlusion.

893  Continuous monitoring of ECG, blood pressure, and oxygen saturations are necessary  
894 during this time.

895  
896 25. Typically, animals begin to show ST changes almost immediately after the occlusion,  
897 with ventricular arrhythmias happening between 20-40 minutes later. Any ventricular  
898 arrhythmias need to be quickly treated by internal cardiac defibrillation using the 35J  
899 cardiac defibrillator device that has been implanted in the beginning of the procedure.  
900 This is done manually, using the header of the ICD programmer, since the device is in  
901 emergency mode.

902  
903 Prompt defibrillation is necessary upon recognition of ventricular arrhythmia. This  
904  may sometimes require multiple defibrillations. Therefore it is important to ensure that  
905 the implanted device has sufficient battery life.

906  
907 26. Coronary perfusion is restored by deflation of the balloon at 90 minutes with a coronary  
908 angiogram confirming re-perfusion down the coronary artery.

909 27. Atenolol 1mg is administered intravenously via the peripheral cannula on reperfusion.

910 28. The guide, balloon and wire are removed from the heart.

911 29. The carotid sheath is removed and the carotid artery is tied off with a 2.0 silk suture  
912 achieving haemostasis.

913  The removal of the carotid sheath is performed simultaneously as the carotid is tied off  
914 to avoid excessive bleeding.

915

916 30. The wound is closed in layers with a 2.0 monocryl absorbable suture.

917 31. The animal is then gradually awakened, extubated, and recovered.

918 32. The animal is checked one hour after recovering from the procedure. Observations are  
919 made from a safe distance to confirm that it is still alive, aware, and moving around in  
920 the pen.

921 33. On the first day, any interaction with the animal is limited to prevent frightening it and  
922 arrhythmias.

923

924 **Reference**

- 925 1. Bhatnagar, P., Wickramasinghe, K., Williams, J., Rayner, M. & Townsend, N.  
926 The epidemiology of cardiovascular disease in the UK 2014. *Heart* **101**, 1182-  
927 1189 (2015).
- 928 2. BHF (2022).
- 929 3. Organization, W.H. World health statistics 2016: monitoring health for the  
930 SDGs sustainable development goals. (World Health Organization, 2016).
- 931 4. Sawyer, D.B. & Vasan, R.S. Encyclopedia of Cardiovascular Research and  
932 Medicine. (Elsevier, 2017).
- 933 5. Ambrose, J.A. & Singh, M. Pathophysiology of coronary artery disease  
934 leading to acute coronary syndromes. *F1000Prime Rep* **7**, 08 (2015).
- 935 6. Fuster, V. Lewis A. Conner Memorial Lecture. Mechanisms leading to  
936 myocardial infarction: insights from studies of vascular biology. *Circulation* **90**,  
937 2126-2146 (1994).
- 938 7. Saleh, M. & Ambrose, J.A. Understanding myocardial infarction. *F1000Res* **7**  
939 (2018).
- 940 8. Reimer, K.A., Lowe, J.E., Rasmussen, M.M. & Jennings, R.B. The wavefront  
941 phenomenon of ischemic cell death. 1. Myocardial infarct size vs duration of  
942 coronary occlusion in dogs. *Circulation* **56**, 786-794 (1977).
- 943 9. Sarafoff, N. et al. Association of ST-elevation and non-ST-elevation  
944 presentation on ECG with transmural and size of myocardial infarction as  
945 assessed by contrast-enhanced magnetic resonance imaging. *J Electrocardiol*  
946 **46**, 100-106 (2013).
- 947 10. Greulich, S. et al. Time-Dependent Myocardial Necrosis in Patients With ST-  
948 Segment-Elevation Myocardial Infarction Without Angiographic Collateral  
949 Flow Visualized by Cardiac Magnetic Resonance Imaging: Results From the  
950 Multicenter STEMI-SCAR Project. *J Am Heart Assoc* **8**, e012429 (2019).
- 951 11. Collet, J.P. et al. 2020 ESC Guidelines for the management of acute coronary  
952 syndromes in patients presenting without persistent ST-segment elevation.  
953 *Eur Heart J* **42**, 1289-1367 (2021).
- 954 12. UK, N.C.G.C. Myocardial Infarction with ST-Segment Elevation: The Acute  
955 Management of Myocardial Infarction with ST-Segment Elevation [Internet].  
956 (2013).
- 957 13. Goldman, L. & Schafer, A.I. Goldman's cecil medicine E-book. (Elsevier  
958 Health Sciences, 2011).
- 959 14. Bhar-Amato, J., Davies, W. & Agarwal, S. Ventricular Arrhythmia after Acute  
960 Myocardial Infarction: 'The Perfect Storm'. *Arrhythm Electrophysiol Rev* **6**,  
961 134-139 (2017).
- 962 15. Torabi, A. et al. The timing of development and subsequent clinical course of  
963 heart failure after a myocardial infarction. *Eur Heart J* **29**, 859-870 (2008).
- 964 16. Takada, T. et al. Impact of Late Ventricular Arrhythmias on Cardiac Mortality  
965 in Patients with Acute Myocardial Infarction. *J Interv Cardiol* **2019**, 5345178  
966 (2019).
- 967 17. Cahill, T.J. & Kharbanda, R.K. Heart failure after myocardial infarction in the  
968 era of primary percutaneous coronary intervention: Mechanisms, incidence  
969 and identification of patients at risk. *World J Cardiol* **9**, 407-415 (2017).
- 970 18. Henkel, D.M. et al. Ventricular arrhythmias after acute myocardial infarction: a  
971 20-year community study. *Am Heart J* **151**, 806-812 (2006).



- 972 19. Camacho Londoño, J.E. et al. A background Ca<sup>2+</sup> entry pathway mediated by  
973 TRPC1/TRPC4 is critical for development of pathological cardiac remodelling.  
974 *Eur Heart J* **36**, 2257-2266 (2015).
- 975 20. Spata, T. et al. A nonthoracotomy myocardial infarction model in an ovine  
976 using autologous platelets. *Biomed Res Int* **2013**, 938047 (2013).
- 977 21. Kim, Y.K. et al. Altered excitation-contraction coupling in myocytes from  
978 remodeled myocardium after chronic myocardial infarction. *JMCC* **34**, 63-73  
979 (2002).
- 980 22. Hegyi, B. et al. Complex electrophysiological remodeling in postinfarction  
981 ischemic heart failure. *Proc Natl Acad Sci U S A* **115**, E3036-e3044 (2018).
- 982 23. Dardenne, A. et al. Benefits of standardizing the treatment of arrhythmias in  
983 the sheep (*Ovis aries*) model of chronic heart failure after myocardial  
984 infarction. *J Am Assoc Lab Anim Sci* **52**, 290-294 (2013).
- 985 24. Dib, N. et al. A percutaneous swine model of myocardial infarction. *J*  
986 *Pharmacol Toxicol Methods* **53**, 256-263 (2006).
- 987 25. Riehle, C. & Bauersachs, J. Small animal models of heart failure.  
988 *Cardiovascular Research* **115**, 1838-1849 (2019).
- 989 26. Sattler, S.M. et al. Ventricular Arrhythmias in First Acute Myocardial Infarction:  
990 Epidemiology, Mechanisms, and Interventions in Large Animal Models.  
991 *Frontiers in Cardiovascular Medicine* **6** (2019).
- 992 27. Ibanez, B. et al. 2017 ESC Guidelines for the management of acute  
993 myocardial infarction in patients presenting with ST-segment elevation: The  
994 Task Force for the management of acute myocardial infarction in patients  
995 presenting with ST-segment elevation of the European Society of Cardiology  
996 (ESC). *Eur Heart J* **39**, 119-177 (2017).
- 997 28. Ikram, H. et al. An ovine model of acute myocardial infarction and chronic left  
998 ventricular dysfunction. *Angiology* **48**, 679-688 (1997).
- 999 29. Bowen, F.W. et al. Reappearance of myocytes in ovine infarcts produced by  
1000 six hours of complete ischemia followed by reperfusion. *Ann Thorac Surg* **71**,  
1001 1845-1855 (2001).
- 1002 30. eBioMedicine The 3Rs of Animal Research. *EBioMedicine* **76**, 103900 (2022).
- 1003 31. Percie du Sert, N. et al. in *PLoS Biol*, Vol. 18 (2020).
- 1004 32. Lee, K.H., Lee, D.W. & Kang, B.C. The 'R' principles in laboratory animal  
1005 experiments. *Lab Anim Res* **36**, 45 (2020).
- 1006 33. Houser, S.R. et al. Animal models of heart failure: a scientific statement from  
1007 the American Heart Association. *Circ Res* **111**, 131-150 (2012).
- 1008 34. Piktel, J.S. & Wilson, L.D. Translational Models of Arrhythmia Mechanisms  
1009 and Susceptibility: Success and Challenges of Modeling Human Disease.  
1010 *Frontiers in Cardiovascular Medicine* **6** (2019).
- 1011 35. Shin, H.S., Shin, H.H. & Shudo, Y. Current Status and Limitations of  
1012 Myocardial Infarction Large Animal Models in Cardiovascular Translational  
1013 Research. *Front Bioeng Biotechnol* **9**, 673683 (2021).
- 1014 36. Flameng, W., Schwarz, F. & Schaper, W. Coronary collaterals in the canine  
1015 heart: development and functional significance. *Am Heart J* **97**, 70-77 (1979).
- 1016 37. Munz, M.R., Faria, M.A., Monteiro, J.R., Aguas, A.P. & Amorim, M.J. Surgical  
1017 porcine myocardial infarction model through permanent coronary occlusion.  
1018 *Comp Med* **61**, 445-452 (2011).
- 1019 38. Milani-Nejad, N. & Janssen, P.M. Small and large animal models in cardiac  
1020 contraction research: advantages and disadvantages. *Pharmacol Ther* **141**,  
1021 235-249 (2014).

- 1022 39. Daubert, M.A. & Jeremias, A. The utility of troponin measurement to detect  
1023 myocardial infarction: review of the current findings. *Vasc Health Risk Manag*  
1024 **6**, 691-699 (2010).
- 1025 40. Thygesen, K. et al. Third universal definition of myocardial infarction. *Eur*  
1026 *Heart J* **33**, 2551-2567 (2012).
- 1027 41. Thygesen, K. et al. Fourth Universal Definition of Myocardial Infarction (2018).  
1028 *J Am Coll Cardiol* **72**, 2231-2264 (2018).
- 1029 42. Leonardi, F. et al. Cardiac Troponin I (cTnI) concentration in an ovine model  
1030 of myocardial ischemia. *Res Vet Sci* **85**, 141-144 (2008).
- 1031 43. Maynard, S.J., Menown, I.B. & Adgey, A.A. Troponin T or troponin I as  
1032 cardiac markers in ischaemic heart disease. *Heart* **83**, 371-373 (2000).
- 1033 44. Dasgupta, A. & Wahed, A. Clinical chemistry, immunology and laboratory  
1034 quality control: a comprehensive review for board preparation, certification  
1035 and clinical practice. (2013).
- 1036 45. Morrow, D.A. et al. National Academy of Clinical Biochemistry Laboratory  
1037 Medicine Practice Guidelines: Clinical characteristics and utilization of  
1038 biochemical markers in acute coronary syndromes. *Circulation* **115**, e356-375  
1039 (2007).
- 1040 46. Mahajan, V.S. & Jarolim, P. How to interpret elevated cardiac troponin levels.  
1041 *Circulation* **124**, 2350-2354 (2011).
- 1042 47. Marti-Carvajal, A.J., Simancas-Racines, D., Anand, V. & Bangdiwala, S.  
1043 Prophylactic lidocaine for myocardial infarction. *Cochrane Database Syst Rev*,  
1044 Cd008553 (2015).
- 1045 48. Locatelli, P. et al. An ovine model of postinfarction dilated cardiomyopathy in  
1046 animals with highly variable coronary anatomy. *ILAR journal* **52**, E16-21  
1047 (2011).
- 1048 49. Hassell, M.E. et al. Long-term left ventricular remodelling after  
1049 revascularisation for ST-segment elevation myocardial infarction as assessed  
1050 by cardiac magnetic resonance imaging. *Open Heart* **4**, e000569 (2017).
- 1051 50. Sutton, M.G. & Sharpe, N. Left ventricular remodeling after myocardial  
1052 infarction: pathophysiology and therapy. *Circulation* **101**, 2981-2988 (2000).
- 1053 51. Rechavia, E. et al. Hyperdynamic performance of remote myocardium in  
1054 acute infarction. Correlation between regional contractile function and  
1055 myocardial perfusion. *Eur Heart J* **16**, 1845-1850 (1995).
- 1056 52. Latini, R., Tognoni, G. & Kates, R.E. Clinical pharmacokinetics of amiodarone.  
1057 *Clin Pharmacokinet* **9**, 136-156 (1984).
- 1058 53. Li, T. et al. Prophylactic amiodarone and lidocaine improve survival in an  
1059 ovine model of large size myocardial infarction. *J Surg Res* **185**, 152-158  
1060 (2013).
- 1061 54. Deshpande, A. & Birnbaum, Y. ST-segment elevation: Distinguishing ST  
1062 elevation myocardial infarction from ST elevation secondary to nonischemic  
1063 etiologies. *World J Cardiol* **6**, 1067-1079 (2014).
- 1064 55. Okada, J.I. et al. Ionic mechanisms of ST segment elevation in  
1065 electrocardiogram during acute myocardial infarction. *J Physiol Sci* **70**, 36  
1066 (2020).
- 1067 56. Di Diego, J.M. & Antzelevitch, C. Acute myocardial ischemia: cellular  
1068 mechanisms underlying ST segment elevation. *J Electrocardiol* **47**, 486-490  
1069 (2014).

- 1070 57. Pfeffer, M.A. & Braunwald, E. Ventricular remodeling after myocardial  
1071 infarction. Experimental observations and clinical implications. *Circulation* **81**,  
1072 1161-1172 (1990).
- 1073 58. Litwin, S.E., Katz, S.E., Morgan, J.P. & Douglas, P.S. Serial  
1074 echocardiographic assessment of left ventricular geometry and function after  
1075 large myocardial infarction in the rat. *Circulation* **89**, 345-354 (1994).
- 1076 59. Pennock, G.D., Yun, D.D., Agarwal, P.G., Spooner, P.H. & Goldman, S.  
1077 Echocardiographic changes after myocardial infarction in a model of left  
1078 ventricular diastolic dysfunction. *Am J Physiol* **273**, H2018-2029 (1997).
- 1079 60. Galli, A. & Lombardi, F. Postinfarct Left Ventricular Remodelling: A Prevailing  
1080 Cause of Heart Failure. *Cardiol Res Pract* **2016**, 2579832 (2016).
- 1081 61. Sutton, M.G.S.J. & Sharpe, N. Left Ventricular Remodeling After Myocardial  
1082 Infarction. *Circulation* **101**, 2981-2988 (2000).
- 1083 62. Rubin, S.A., Fishbein, M.C. & Swan, H.J. Compensatory hypertrophy in the  
1084 heart after myocardial infarction in the rat. *J Am Coll Cardiol* **1**, 1435-1441  
1085 (1983).
- 1086 63. Siddiqui, B.A. & Kim, P.Y. in StatPearls (StatPearls Publishing  
1087 Copyright © 2022, StatPearls Publishing LLC., Treasure Island (FL); 2022).
- 1088 64. Kleemann, T. et al. 96-42: Comparison of lead failure rates between DF-1 and  
1089 DF-4 ICD leads in clinical practice. *EP Europace* **18**, i71-i71 (2016).
- 1090 65. Rajappan, K. Permanent pacemaker implantation technique: part II. *Heart* **95**,  
1091 334-342 (2009).
- 1092 66. Swerdlow, C.D. et al. Impedance in the Diagnosis of Lead Malfunction. *Circ*  
1093 *Arrhythm Electrophysiol* **13**, e008092 (2020).
- 1094 67. Seldinger, S.I. Catheter replacement of the needle in percutaneous  
1095 arteriography; a new technique. *Acta radiol* **39**, 368-376 (1953).

1096
